# Supplementary material for: Real-World Cost Evaluation of Conbercept vs Ranibizumab for Retinal and Choroidal Vascular Diseases from 2021 to 2024: Evidence from Societal and Medical Insurance Perspectives
Source: Research Square preprint supplement (doi:10.21203/rs.3.rs-7266099/v1), 2025-10-31
Supplement: Supplementary file 1 [file 28978cb0c1eded0e38dcea2c.docx]

**Part A. The Supplementary Information of the PHOENIX, BLOSSOM, CAMELLIA, SAILING and SHINY studies**

**Table S1** The health status classification and baseline visual acuity distribution

|  | the PHOENIX study (n=81) | | | the BLOSSOM study (n=190) | | | the CAMELLIA study (n=190) | | | the SAILING study (n=248) | | | the SHINY study (n=177) * | | |
| --- | --- | --- | --- | --- | --- | --- | --- | --- | --- | --- | --- | --- | --- | --- | --- |
| No visual impairment | BCVA > 78 | / | / | 66≤BCVA≤100 | 48 | 25.3% | 66≤BCVA≤100 | 27 | 14.3% | BCVA > 75 | / | / | BCVA > 75 | / | / |
| Slight visual impairment | 68< BCVA≤ 78 | 9 | 11.11% | - | - | - | - | - | - | - | - | - | - | - | - |
| Mild visual impairment | 53< BCVA≤ 68 | 31 | 38.27% | 56≤BCVA≤65 | 70 | 36.6% | 56≤BCVA≤65 | 64 | 33.8% | 60< BCVA≤ 75 | 108 | 43.60% | 60< BCVA≤ 75 | 52 | 29.38% |
| Moderate visual impairment | 33< BCVA≤ 53 | 26 | 32.11% | 46≤BCVA≤55 | 41 | 21.5% | 46≤BCVA≤55 | 52 | 27.0% | 45< BCVA≤ 60 | 104 | 41.90% | 45< BCVA≤ 60 | 79 | 44.63% |
| Severe visual impairment | 18< BCVA≤ 33 | 14 | 17.28% | 36≤BCVA≤45 | 24 | 12.9% | 36≤BCVA≤45 | 27 | 14.3% | 30< BCVA≤ 45 | 29 | 11.70% | 30< BCVA≤ 45 | 36 | 20.34% |
| Blindness | BCVA ≤ 18 | 1 | 1.23% | BCVA≤35 | 7 | 3.7% | BCVA≤35 | 20 | 10.6% | BCVA ≤ 30 | 7 | 2.80% | BCVA ≤ 30 | 10 | 5.65% |
| The data in the table are the number and percentage of patients with corresponding baseline visual acuity.  * The number of participants in the SHINY study was 176 when designed, and 177 participants were actually enrolled. | | | | | | | | | | | | | | | |

The PHOENIX Study

**Study Design**

**Study Type:** Interventional (Clinical Trial)

**Actual Enrollment:** 125 participants

**Allocation:** Randomized

**Intervention Model:** Parallel Assignment

**Masking:** Quadruple - masking involving the participants, care providers, investigators, and outcomes assessors.

**Primary Purpose:** Treatment

**Intervention:** Recombinant Human VEGF Receptor-Fc Fusion Protein (Intravitreal injection of KH902 once per month)

**Study Arms：**

- **Experimental Group**

**Treatment Regimen:** Patients in the experimental group will first receive intravitreal injections of 0.5mg KH902 per eye once a month for three times in the study eye. At the end of month 3 (visit 5), they will get 2 sham injections monthly. After that, starting from month 5, they will receive intravitreal injections of KH902 once every three months until month 12 (specifically at month 5, month 8, and month 11).

**Intervention:** The intervention for this group is a biological agent, Recombinant Human VEGF Receptor - Fc Fusion Protein, in the form of intravitreal KH902 injections following the above - mentioned schedule.

- **Sham Comparator Group**

**Treatment Regimen:** Initially, patients in the sham comparator group will receive sham injections once a month for three times. Subsequently, they will receive intravitreal injections of 0.5mg KH902 per eye once a month for three times in the study eye. After three months of treatment, from month 8, they will receive intravitreal injections of KH902 once every three months until month 12 (at month 8 and month 11).

**Intervention:** The intervention for this group includes sham injections in the initial stage and then intravitreal injections of Recombinant Human VEGF Receptor - Fc Fusion Protein (KH902) following the specific schedule.

**Eligibility Criteria**

**Ages Eligible for Study:** 50 Years and older (Adult, Older Adult)

**Sexes Eligible for Study:** All

**Accepts Healthy Volunteers:** No

**Criteria:**

1. Inclusion Criteria:

- The patient has signed the Informed Consent Form.
- The patient is at least 50 years old, regardless of gender.
- For the study eye, the total lesion size is no more than 30 mm².
- The BCVA score of the study eye ranges from 19 to 73 letters.
- The ocular media is clear, and the pupil can be dilated adequately to enable high - quality fundus photographic imaging.
- The BCVA score of the fellow eye is 19 letters or more.

1. Exclusion Criteria:

- The patient currently has or has a history of non - exudative AMD diseases that can affect the inspection and measurement of the macula or central visual acuity.
- In the study eye, the subretinal hemorrhage area is 50% or more of the total lesion size.
- In the study eye, the scar or fibrosis area is 50% or more of the total lesion size; or there is central foveal scar, fibrosis, or atrophy of the macula.
- The study eye has a retinal pigment epithelial tear, retinal macular traction, macular epiretinal membrane, or has been diagnosed with polypoidal choroidal vasculopathy.
- The patient has received anti - VEGF drug treatment in the study eye within six months before screening, or anti - VEGF treatment in the fellow eye within three months before screening.
- The patient has had previous intraocular or periocular operations, except for eyelid operations that do not interfere with intravitreal injection in the study eye.
- The patient has had previous ophthalmologic operations in the study eye.
- There is currently active inflammation or infection in either eye.
- The patient has uncontrolled glaucoma (either previous or current) in either eye, or has had a previous glaucoma filtering operation in the study eye.
- The patient is currently taking systemic medications that may cause toxicity to the crystalline lens.
- The patient has a history of allergy or a current allergic response.
- The patient has had surgery within one month before enrollment.
- The patient has infectious diseases that require systemic treatment.
- The patient has systemic autoimmune diseases.
- The patient has any uncontrolled clinical disorders.
- Female patients of child - bearing potential have not used adequate contraception methods.
- The patient is pregnant or nursing.
- In the opinion of the investigators, the patient should be excluded.

The BLOSSOM Study

**Study Design**

**Study Type:** Interventional (Clinical Trial)
**Actual Enrollment:** 283 participants **Allocation:** Randomized **Intervention Model:** Parallel Assignment **Masking:** Double - masked **Primary Purpose:** Treatment **Official Title:** Efficacy and Safety of Ranibizumab in Asian Patients with Branch Retinal Vein Occlusion: Results from the Randomized BLOSSOM Study
**Intervention:**

1.Ranibizumab 0.5 mg (Intravitreal injection of 0.5mg ranibizumab. The ranibizumab group received this treatment with a corresponding injection regimen).

2.Sham (Sham injection. The sham group received sham injections in the early stage, and some patients switched to receive ranibizumab treatment later).

**Study Arms：**

**Experimental: Ranibizumab 0.5 mg：**Patients will receive intravitreal injection of Ranibizumab 0.5mg/eye monthly for at least 3 times until stable maximal visual acuity (VA) is achieved. After that, an individualized VA stabilization criteria - driven pro re nata (PRN) regimen is followed.

**Sham Comparator:Sham - injection：**Patients will receive sham injection monthly up to month 5. From month 6, they could receive intravitreal injection of Ranibizumab 0.5mg/eye PRN. After that, they will receive intravitreal injection of Ranibizumab 0.5mg/eye once every three months, till month 12.

**Intervention：**

**Experimental Group：**Biological: Ranibizumab 0.5 mg (Intravitreal injection of Ranibizumab 0.5mg/eye with specific injection frequency according to the treatment plan)

**Sham Comparator Group：**Biological: Ranibizumab 0.5 mg (Intravitreal injection of Ranibizumab 0.5mg/eye with specific injection frequency after month 6 according to the treatment plan), Sham injection (Received in the early stage of the study)

**Eligibility Criteria**

**Ages Eligible for Study:** 18 Years and older
**Sexes Eligible for Study:** All
**Accepts Healthy Volunteers:** No

**Criteria:**

1. Inclusion Criteria:

- Signed the Informed Consent Form.
- 18 years old or older.
- A study eye best - corrected VA (BCVA) score ≥19 and ≤73 Early Treatment Diabetic Retinopathy Study (ETDRS) letters at screening and baseline visits (approximate Snellen equivalent of 20/400 and 20/40) and at least 34 letters in the fellow eye. If both eyes were eligible, the eye with the worse VA at the screening visit was selected as the study eye, unless, on the basis of medical reasons, the investigator deemed the other eye more appropriate for treatment and study inclusion. Only the study eye was treated with ranibizumab or sham injections.

1. Exclusion Criteria:

- Any ocular medical condition that may confound the interpretation of study results, compromise VA, affect ME, or require medical or surgical intervention in the study eye during the 12 - month study period.
- Any type of ocular or systemic disease or its treatment that may have biased the assessment of the clinical status of the patient to a significant degree or put the patient at special risk.
- Malignancy of any organ system within the 5 years before screening.
- Stroke or myocardial infarction <3 months before screening.
- Confirmed uncontrolled blood pressure defined as a systolic value of >160 mmHg or a diastolic value of >100 mmHg at the screening or baseline visit.
- Use of any systemic anti - VEGF agents within 6 months before the baseline visit, treatment with any antiangiogenic agents within 3 months before the baseline visit in either eye, panretinal photocoagulation within 3 months before the baseline or anticipated within the next 12 months after the baseline visit in the study eye.
- Focal/grid laser photocoagulation within 4 months before the baseline visit.
- Any intraocular procedure (including yttrium - aluminum - garnet capsulotomy) within 2 months before the baseline visit or anticipated within the next 12 months after the baseline visit.
- Use of systemic or topical corticosteroids administered for at least 30 days within 6 months before the screening visit.
- Use of intraocular/periocular corticosteroids (including sub - tenon and implants) within 3 months before screening visit.
- History of vitrectomy, optic neurotomy, sheathotomy, or filtration surgery.
- Use of other investigational drugs within 30 days or 5 half - lives of the baseline visit, whichever was longer.
- Current or planned use of systemic medications known to be toxic to the lens, retina, or optic nerve.
- Known hypersensitivity to ranibizumab or any component of the ranibizumab formulation, or fluorescein.
- Pregnant or nursing women and women not on reliable contraception.

The CAMELLIA Study

**Study Design**

**Study Type:** Interventional (Clinical Trial)

**Actual Enrollment:** 252 participants

**Allocation:** Randomized

**Intervention Model:** Parallel Assignment

**Masking:** Double

**Primary Purpose:** Treatment

**Official Title:**Ranibizumab 0.5 mg in Asian patients with visual impairment due to macular edema secondary to central retinal vein occlusion: results from the 12-month CAMELLIA study

**Intervention:**Patients with central retinal veinwere randomized 3:1 to receive ranibizumab pro re nata (PRN) or sham.The main intervention measure is to use ranibizumab 0.5 mg for treatment.

**Study Arms:**

- Ranibizumab-group patients received 3 initial consecutive monthly injections, followed by individualized stabilization criteria-driven PRN treatment.
- Sham-group patients received sham injections up to Month 2 and could receive ranibizumab PRN from Month 3 onwards.

The SAILING Study

**Study Design**

**Study Type:** Interventional (Clinical Trial)

**Actual Enrollment:** 248 participants

**Allocation:** Randomized

**Intervention Model:** Parallel Assignment

**Masking:** Quadruple (Participant, Care Provider, Investigator, Outcomes Assessor)

**Primary Purpose:** Treatment

**Intervention:**

- Drug: Conbercept (Intravitreal injection of 0.5 mg Conbercept in the first month, and then repeated as required.)
- Other: Sham injection (Sham intravitreal injection in the first month, and then repeated as required.)
- Procedure: Laser Treatment (Laser treatment in the first month, and then repeated as required.)
- Other: Sham Laser Treatment (Sham laser treatment in the first month, and then repeated as required.)

**Study Arms:**

- **Experimental: Conbercept treatment group**

Conduct the first Conbercept injection and sham laser treatment on day 0. Researchers will decide whether the subjects need to receive repeated treatment according to the monthly assessment results.

**Interventions:**

- - Drug: Conbercept
  - Other: Sham laser
- **Positive Control Group: Laser treatment group**

Conduct the first laser treatment and sham injection on day 0. Researchers will decide whether repeated laser treatment is needed according to the monthly results during the follow-up visit after 3 months.

**Interventions:**

- - Other: Sham injection
  - Procedure: Laser

**Eligibility Criteria**

**Ages Eligible for Study:** 18 years old and above (Adults, Older Adults)

**Sexes Eligible for Study:** All

**Accepts Healthy Volunteers:** No

**Criteria:**

1. Inclusion Criteria:

- Patients sign the informed consent form and are willing and able to comply with all follow-up requirements.
- Age ≥ 18 years old, regardless of gender.
- Diagnosis of type 1 or type 2 diabetes mellitus.
- Serum glycated hemoglobin (HbA1c) ≤ 10%.
- The study eye must meet the following conditions.
- Visual impairment caused by diabetic macular edema (DME) involving the fovea centralis.
- The best corrected visual acuity (BCVA) score is ≥ 24 and ≤ 73 letters in the Early Treatment Diabetic Retinopathy Study (ETDRS) 4-meter/1-meter test (equivalent to Snellen visual acuity chart 20/40 to 20/320).
- Visual impairment caused by choroidal neovascularization (CNV) secondary to high myopia.
- The central retinal thickness (CRT) ≥ 300μm (measured by spectral domain optical coherence tomography (OCT), and the CRT measurement results must be confirmed by the central reading center).
- Opacities of the refractive media and miosis do not affect fundus examination.
- The BCVA of the non-study eye ≥ 24 letters (equivalent to Snellen visual acuity 20/320).

1. Exclusion Criteria:

- Active infectious ocular inflammation in either eye.
- Proliferative diabetic retinopathy (PDR) in the study eye, except for inactive and regressed PDR.
- Any other ocular diseases in the study eye that may cause macular edema, excluding diabetic retinopathy.
- Iris neovascularization in the study eye.
- Uncontrolled glaucoma or a history of glaucoma surgery.
- Aphakia in the study eye.
- A history of vitrectomy in the study eye.
- A history of panretinal laser photocoagulation (PRP) in the study eye within 6 months before screening, or the possibility of needing panretinal photocoagulation of the study eye during the study.
- Hepatic or renal dysfunction.
- A history of allergic reactions to fluorescein, protein agents for diagnosis or treatment, or being allergic to more than 2 drug or non-drug factors, or having concurrent allergic diseases.

The SHINY Study

**Study Design**

**Study Type:** Interventional (Clinical Trial)

**Actual Enrollment:** 176 participants

**Allocation:** Randomized

**Intervention Model:** Parallel Assignment

**Masking:** Double (Participant, Investigator)

**Primary Purpose:** Treatment

**Intervention:**

- Drug:Conbercept, Fixed Dose Group (Intravitreal injection of 0.5 mg Conbercept per month, with fixed injection schedule)
- Drug: Conbercept, PRN (Pro Re Nata) Group (Intravitreal injection of 0.5 mg Conbercept
- Other: Sham Injection (Sham intravitreal injection per month, with fixed injection schedule)

**Study Arms:**

- **Experimental: Conbercept Treatment Group**

Subjects will receive Conbercept injections at a dose of 0.5 mg per eye. The injection will be administered once a month for the first 3 months. In the following 6 months, the investigators will decide whether repeated injections are needed based on the monthly assessment results.

**InterventionsMeasures:**

- - Drug: Conbercept, Fixed Dose Group
  - Drug: Conbercept, PRN Group
- **Sham Injection Control Group: Sham**

Subjects will receive sham injections monthly for 3 months and then receive a 0.5 mg per eye Conbercept injection at the 4th month. From the 5th month to the 9th month, the investigators will decide whether repeated injections are needed based on the monthly assessment results.

**Interventions:**

- - Drug: Conbercept, Fixed Dose Group
  - Drug: Conbercept, PRN Group
  - Other: Sham Injection

**Eligibility Criteria**

**Ages Eligible for Study:** 18 years old and above (Adults, Older Adults)

**Sexes Eligible for Study:** All genders are eligible

**Accepts Healthy Volunteers:** No

**Criteria:**

1. Inclusion Criteria:

- Patients provide fully informed consent and are willing and able to comply with all study procedures.
- The study eye must meet the following criteria:
- Myopia with a degree of ≥ -6.00 diopters (D), and an axial length ≥ 26.5 mm.
- Diagnosis of active subfoveal, juxafoveal, or extrafoveal choroidalneovascularization (CNV) secondary to high myopia.
- Visual impairment caused by CNV secondary to high myopia.
- The best corrected visual acuity (BCVA) score in the Early Treatment Diabetic Retinopathy Study (ETDRS) is ≥ 24 and ≤ 73 letters (approximately equivalent to 20/40 to 20/320 on the Snellen visual acuity chart).
- The ocular media has sufficient quality to obtain fundus and optical coherence tomography (OCT) images.
- The BCVA score of the fellow eye is ≥ 19 ETDRS letters (approximately equivalent to 20/400 on the Snellen visual acuity chart)

1. Exclusion Criteria:

- Current vitreous hemorrhage in either eye.
- The study eye has received intravitreal corticosteroid treatment within the last 3 months or periocular corticosteroid treatment within the last month.
- Active infectious ocular inflammation in either eye.
- Fibrosis or atrophy involving the center of foveal in the study eye.
- Any concurrent intraocular condition in the study eye that, in the opinion of investigator, could either require medical or surgical intervention during the study period to prevent or treat potential visual loss caused by that disease.
- The lesion size in the study eye is ≥ 30 square millimeters.
- Any ocular disease in the study eye that, in the opinion of the investigators, may interfere with the interpretation of the study results.
- Uncontrolled glaucoma in the study eye, or a cup-to-disc ratio > 0.8 in the study eye.
- Aphakia (excluding artificial lens) in the study eye.
- Severe amblyopia and amaurosis in the fellow eye.

**Part B. Sensitivity Analysis**

**Supplemental Materials**

| **Table of Contents** | **Page** |
| --- | --- |
| **Table S1.** The prices of conbercept and ranibizumaband the daily wage. | 4 |
| **Table S2.** The number of days lost from work. | 4 |
| **Table S3.** The Two-way Sensitivity Analysis of Conbercept and Ranibizumab from the Perspective of the Whole Society in 2021. | 4 |
| **Table S4.** The Two-way Sensitivity Analysis of Conbercept and Ranibizumab from the Perspective of the Whole Society in 2022. | 6 |
| **Table S5.** The Two-way Sensitivity Analysis of Conbercept and Ranibizumab from the Perspective of the Whole Society in 2023. | 7 |
| **Table S6.** The Two-way Sensitivity Analysis of Conbercept and Ranibizumab from the Perspective of the Whole Society in 2024. | 9 |
| **Figure S1.** The Cost-Effectiveness Acceptability Curve of conbercept and ranibizumab in treatment of AMD from the Perspective of the Whole Society. | 11 |
| **Figure S2.** The Cost-Effectiveness Acceptability Curve of conbercept and ranibizumab in treatment of BRVO from the Perspective of the Whole Society. | 12 |
| **Figure S3.** The Cost-Effectiveness Acceptability Curve of conbercept and ranibizumab in treatment of CRVO from the Perspective of the Whole Society. | 13 |
| **Figure S4.** The Cost-Effectiveness Acceptability Curve of conbercept and ranibizumab in treatment of DME from the Perspective of the Whole Society. | 14 |
| **Figure S5.** The Cost-Effectiveness Acceptability Curve of conbercept and ranibizumab in treatment of PM from the Perspective of the Whole Society. | 15 |
| **Table S7.**The Two-way Sensitivity Analysis of Conbercept and Ranibizumab from the Perspective of the Health Insurance Payer in 2021. | 16 |
| **Table S8.**The Two-way Sensitivity Analysis of Conbercept and Ranibizumab from the Perspective of the Health Insurance Payer in 2022. | 17 |
| **Table S9.** The Two-way Sensitivity Analysis of Conbercept and Ranibizumab from the Perspective of the Health Insurance Payer in 2023. | 19 |

| **Table S10.** The Two-way Sensitivity Analysis of Conbercept and Ranibizumab from the Perspective of the Health Insurance Payer in 2024. | 21 |
| --- | --- |
| **Figure S6.** The Cost-Effectiveness Acceptability Curve of conbercept and ranibizumab in treatment of AMD from the Perspective of the Health Insurance Payer. | 24 |
| **Figure S7.** The Cost-Effectiveness Acceptability Curve of conbercept and ranibizumab in treatment of BRVO from the Perspective of the Health Insurance Payer. | 25 |
| **Figure S8.** The Cost-Effectiveness Acceptability Curve of conbercept and ranibizumab in treatment of CRVO from the Perspective of the Health Insurance Payer. | 26 |
| **Figure S9.** The Cost-Effectiveness Acceptability Curve of conbercept and ranibizumab in treatment of DME from the Perspective of the Health Insurance Payer. | 27 |
| **Figure S10.** The Cost-Effectiveness Acceptability Curve of conbercept and ranibizumab in treatment of PM from the Perspective of the Health Insurance Payer. | 28 |
| **Table S11.** The one-way sensitivity analysis with different numbers of conbercept injections from the Perspective of the Whole Society in 2021. | 29 |
| **Table S12.** The one-way sensitivity analysis with different numbers of ranibizumabinjections from the Perspective of the Whole Society in 2021. | 31 |
| **Table S13.** The one-way sensitivity analysis with different numbers of conbercept injections from the Perspective of the Whole Society in 2022. | 33 |
| **Table S14.** The one-way sensitivity analysis with different numbers of ranibizumab injections from the Perspective of the Whole Society in 2022. | 35 |
| **Table S15.** The one-way sensitivity analysis with different numbers of conbercept injections from the Perspective of the Whole Society in 2023. | 37 |
| **Table S16.** The one-way sensitivity analysis with different numbers of ranibizumab injections from the Perspective of the Whole Society in 2023. | 39 |
| **Table S17.** The one-way sensitivity analysis with different numbers of conbercept injections from the Perspective of the Whole Society in 2024. | 41 |
| **Table S18.** The one-way sensitivity analysis with different numbers of ranibizumab injections from the Perspective of the Whole Society in 2024. | 43 |
| **Table S19.** The one-way sensitivity analysis with different numbers of conbercept injections from the Perspective of the Health Insurance Payer in 2021. | 45 |
| **Table S20.** The one-way sensitivity analysis with different numbers of ranibizumab injections from the Perspective of the Health Insurance Payer in 2021. | 47 |
| **Table S21.** The one-way sensitivity analysis with different numbers of conbercept injections from the Perspective of the Health Insurance Payer in 2022. | 49 |
| **Table S22.** The one-way sensitivity analysis with different numbers of ranibizumab injections from the Perspective of the Health Insurance Payer in 2022. | 51 |
| **Table S23.** The one-way sensitivity analysis with different numbers of conbercept injections from the Perspective of the Health Insurance Payer in 2023. | 53 |
| **Table S24.** The one-way sensitivity analysis with different numbers of ranibizumab injections from the Perspective of the Health Insurance Payer in 2023. | 55 |
| **Table S25.** The one-way sensitivity analysis with different numbers of conbercept injections from the Perspective of the Health Insurance Payer in 2024. | 57 |
| **Table S26.** The one-way sensitivity analysis with different numbers of ranibizumab injections from the Perspective of the Health Insurance Payer in 2024. | 59 |

**Table S1.** The prices of conbercept and ranibizumab and the daily wage.

|  | conbercept | ranibizumab | Daily wage |
| --- | --- | --- | --- |
| 2021（RMB） | 4160 | 3950 | 96.2 |
| 2022（RMB） | 3452.8 | 3950 | 101.05 |
| 2023（RMB） | 3452.8 | 3950 | 107.45 |
| 2024（RMB） | 3452.8 | 3673.5 | 113.19 |

**Table S2.** The number of days lost from work.

|  | Days lost from work |
| --- | --- |
| Age-related macular degeneration | 98.14 |
| Branch Retinal Vein Occlusion | 83.056 |
| Central Retinal Vein Occlusion | 113.662 |
| Diabetic macular edema | 108.96 |
| Pathological myopia | 122.37 |

**Table S3.**The Two-way Sensitivity Analysis of Conbercept and Ranibizumab from the Perspective of the Whole Society in 2021.

|  | Price | Strategy | Cost (RMB) | Incremental costs | Effectiveness (QALYs) | Incremental effectiveness | CER | ICER |
| --- | --- | --- | --- | --- | --- | --- | --- | --- |
| Age-related macular degeneration | down 10% | conbercept | 202749.392 | - | 7.824 | - | 25913.777 | - |
| ranibizumab | 228136.002 | 25386.610 | 8.490 | 0.665 | 26871.143 | 38118.033 |
|  | 0 | conbercept | 225277.102 | - | 7.824 | - | 28791.715 | - |
|  | ranibizumab | 253484.447 | 28207.346 | 8.490 | 0.665 | 29858.361 | 42404.890 |
|  | up 10% | conbercept | 247804.812 | - | 7.824 | - | 31672.394 | - |
|  | ranibizumab | 278832.892 | 31028.080 | 8.490 | 0.665 | 32842.508 | 46588.709 |
| Branch Retinal Vein Occlusion | down 10% | conbercept | 145382.381 | - | 8.346 | - | 17419.408 | - |
| ranibizumab | 261336.895 | 115954.514 | 8.297 | -0.049 | 31497.758 | -2366418.653 |
|  | 0 | conbercept | 161535.979 | - | 8.346 | - | 19355.197 | - |
|  | ranibizumab | 290374.328 | 128838.350 | 8.297 | -0.049 | 34997.782 | -2632799.096 |
|  | up 10% | conbercept | 177689.577 | - | 8.346 | - | 21290.388 | - |
|  | ranibizumab | 319411.761 | 141722.184 | 8.297 | -0.049 | 38497.259 | -2892289.469 |
| Central Retinal Vein Occlusion | down 10% | conbercept | 174852.645 | - | 8.156 | - | 21438.529 | - |
| ranibizumab | 267832.586 | 92979.941 | 8.135 | -0.021 | 32923.489 | -4427616.238 |
|  | 0 | conbercept | 194280.717 | - | 8.156 | - | 23821.369 | - |
|  | ranibizumab | 297591.762 | 103311.045 | 8.135 | -0.021 | 36581.674 | -4982016.597 |
|  | up 10% | conbercept | 213708.789 | - | 8.156 | - | 26202.647 | - |
|  | ranibizumab | 327350.938 | 113642.149 | 8.135 | -0.021 | 40239.82 | -5411530.905 |
| Diabetic macular edema | down 10% | conbercept | 286493.198 | - | 6.973 | - | 41084.540 | - |
| ranibizumab | 266745.087 | -19748.111 | 6.758 | -0.215 | 39470.492 | 91778.336 |
|  | 0 | conbercept | 318325.776 | - | 6.973 | - | 45649.489 | - |
|  | ranibizumab | 296383.430 | -21942.346 | 6.758 | -0.215 | 43856.103 | 101975.929 |
|  | up 10% | conbercept | 350158.354 | - | 6.973 | - | 50214.438 | - |
|  | ranibizumab | 326021.773 | -24136.581 | 6.758 | -0.215 | 48241.713 | 112173.521 |
| Pathological myopia | down 10% | conbercept | 252750.189 | - | 7.528 | - | 33576.399 | - |
| ranibizumab | 239932.551 | -12817.638 | 7.499 | -0.028 | 31994.505 | 450775.291 |
|  | 0 | conbercept | 280833.543 | - | 7.528 | - | 37307.110 | - |
|  | ranibizumab | 266591.723 | -14241.820 | 7.499 | -0.028 | 35549.450 | 500861.434 |
|  | up 10% | conbercept | 308916.897 | - | 7.528 | - | 41037.820 | - |
|  | ranibizumab | 293250.895 | -15666.002 | 7.499 | -0.028 | 39104.395 | 550947.577 |

**Table S4.** The Two-way Sensitivity Analysis of Conbercept and Ranibizumab from the Perspective of the Whole Society in 2022.

|  | Price | Strategy | Cost (RMB) | Incremental costs | Effectiveness (QALYs) | Incremental effectiveness | CER | ICER |
| --- | --- | --- | --- | --- | --- | --- | --- | --- |
| Age-related macular degeneration | down 10% | conbercept | 258195.815 | - | 7.824 | - | 33000.488 | - |
| ranibizumab | 261766.628 | 3570.813 | 8.490 | 0.665 | 30832.347 | 5361.581 |
|  | 0 | conbercept | 286884.239 | - | 7.824 | - | 36665.463 | - |
|  | ranibizumab | 290851.809 | 3967.570 | 8.490 | 0.665 | 34259.926 | 5964.559 |
|  | up 10% | conbercept | 315572.663 | - | 7.824 | - | 40333.929 | - |
|  | ranibizumab | 319936.990 | 4364.327 | 8.490 | 0.665 | 37683.98 | 6553.044 |
| Branch Retinal Vein Occlusion | down 10% | conbercept | 237167.341 | - | 8.346 | - | 28416.887 | - |
| ranibizumab | 258329.509 | 21162.168 | 8.297 | -0.049 | 31135.291 | -431880.98 |
|  | 0 | conbercept | 263519.268 | - | 8.346 | - | 31574.807 | - |
|  | ranibizumab | 287032.788 | 23513.521 | 8.297 | -0.049 | 34595.038 | -480496.496 |
|  | up 10% | conbercept | 289871.195 | - | 8.346 | - | 34731.751 | - |
|  | ranibizumab | 315736.067 | 25864.872 | 8.297 | -0.049 | 38054.245 | -527854.531 |
| Central Retinal Vein Occlusion | down 10% | conbercept | 230047.723 | - | 8.156 | - | 28205.949 | - |
| ranibizumab | 362504.442 | 132456.719 | 8.135 | -0.021 | 44561.087 | -6307462.81 |
|  | 0 | conbercept | 255608.581 | - | 8.156 | - | 31340.971 | - |
|  | ranibizumab | 402782.713 | 147174.132 | 8.135 | -0.021 | 49512.344 | -7097246.654 |
|  | up 10% | conbercept | 281169.439 | - | 8.156 | - | 34473.938 | - |
|  | ranibizumab | 443060.984 | 161891.545 | 8.135 | -0.021 | 54463.551 | -7709121.19 |
| Diabetic macular edema | down 10% | conbercept | 271807.115 | - | 6.973 | - | 38978.483 | - |
| ranibizumab | 283629.053 | 11821.939 | 6.758 | -0.215 | 41968.827 | -54941.854 |
|  | 0 | conbercept | 302007.905 | - | 6.973 | - | 43309.425 | - |
|  | ranibizumab | 315143.393 | 13135.487 | 6.758 | -0.215 | 46632.030 | -61046.505 |
|  | up 10% | conbercept | 332208.696 | - | 6.973 | - | 47640.368 | - |
|  | ranibizumab | 346657.732 | 14449.036 | 6.758 | -0.215 | 51295.233 | -67151.155 |
| Pathological myopia | down 10% | conbercept | 250141.205 | - | 7.528 | - | 33229.810 | - |
| ranibizumab | 266153.039 | 16011.834 | 7.499 | -0.028 | 35490.952 | -563109.933 |
|  | 0 | conbercept | 277934.672 | - | 7.528 | - | 36922.011 | - |
|  | ranibizumab | 295725.599 | 17790.927 | 7.499 | -0.028 | 39434.392 | -625677.703 |
|  | up 10% | conbercept | 305728.139 | - | 7.528 | - | 40614.212 | - |
|  | ranibizumab | 325298.159 | 19570.020 | 7.499 | -0.028 | 43377.831 | -688245.473 |

**Table S5.** The Two-way Sensitivity Analysis of Conbercept and Ranibizumab from the Perspective of the Whole Society in 2023.

|  | Price | Strategy | Cost (RMB) | Incremental costs | Effectiveness (QALYs) | Incremental effectiveness | CER | ICER |
| --- | --- | --- | --- | --- | --- | --- | --- | --- |
| Age-related macular degeneration | down 10% | conbercept | 266040.590 | - | 7.824 | - | 34003.143 | - |
| ranibizumab | 263771.410 | -2269.180 | 8.490 | 0.665 | 31068.482 | -3407.177 |
|  | 0 | conbercept | 295600.655 | - | 7.824 | - | 37779.472 | - |
|  | ranibizumab | 293079.345 | -2521.309 | 8.490 | 0.665 | 34522.311 | -3790.354 |
|  | up 10% | conbercept | 325160.721 | - | 7.824 | - | 41559.397 | - |
|  | ranibizumab | 322387.280 | -2773.441 | 8.490 | 0.665 | 37972.589 | -4164.326 |
| Branch Retinal Vein Occlusion | down 10% | conbercept | 228294.902 | - | 8.346 | - | 27353.81 | - |
| ranibizumab | 247780.234 | 19485.332 | 8.297 | -0.049 | 29863.834 | -397659.837 |
|  | 0 | conbercept | 253661.002 | - | 8.346 | - | 30393.592 | - |
|  | ranibizumab | 275311.371 | 21650.369 | 8.297 | -0.049 | 33182.297 | -442423.176 |
|  | up 10% | conbercept | 279027.102 | - | 8.346 | - | 33432.435 | - |
|  | ranibizumab | 302842.508 | 23815.406 | 8.297 | -0.049 | 36500.242 | -486028.694 |
| Central Retinal Vein Occlusion | down 10% | conbercept | 259437.466 | - | 8.156 | - | 31809.400 | - |
| ranibizumab | 304781.902 | 45344.436 | 8.135 | -0.021 | 37465.507 | -2159258.857 |
|  | 0 | conbercept | 288263.851 | - | 8.156 | - | 35344.936 | - |
|  | ranibizumab | 338646.558 | 50382.707 | 8.135 | -0.021 | 41628.363 | -2429628.701 |
|  | up 10% | conbercept | 317090.236 | - | 8.156 | - | 38878.155 | - |
|  | ranibizumab | 372511.214 | 55420.978 | 8.135 | -0.021 | 45791.176 | -2639094.190 |
| Diabetic macular edema | down 10% | conbercept | 271166.211 | - | 6.973 | - | 38886.574 | - |
| ranibizumab | 284594.104 | 13427.893 | 6.758 | -0.215 | 42111.626 | -62405.446 |
|  | 0 | conbercept | 301295.790 | - | 6.973 | - | 43207.305 | - |
|  | ranibizumab | 316215.671 | 14919.881 | 6.758 | -0.215 | 46790.696 | -69339.384 |
|  | up 10% | conbercept | 331425.369 | - | 6.973 | - | 47528.035 | - |
|  | ranibizumab | 347837.238 | 16411.870 | 6.758 | -0.215 | 51469.765 | -76273.323 |
| Pathological myopia | down 10% | conbercept | 251683.913 | - | 7.528 | - | 33434.750 | - |
| ranibizumab | 262193.222 | 10509.309 | 7.499 | -0.028 | 34962.919 | -369595.148 |
|  | 0 | conbercept | 279648.792 | - | 7.528 | - | 37149.722 | - |
|  | ranibizumab | 291325.802 | 11677.010 | 7.499 | -0.028 | 38847.688 | -410661.276 |
|  | up 10% | conbercept | 307613.672 | - | 7.528 | - | 40864.695 | - |
|  | ranibizumab | 320458.383 | 12844.711 | 7.499 | -0.028 | 42732.457 | -451727.403 |

**Table S6.**The Two-way Sensitivity Analysis of Conbercept and Ranibizumab from the Perspective of the Whole Society in 2024.

|  | Price | Strategy | Cost (RMB) | Incremental costs | Effectiveness (QALYs) | Incremental effectiveness | CER | ICER |
| --- | --- | --- | --- | --- | --- | --- | --- | --- |
| Age-related macular degeneration | down 10% | conbercept | 224322.539 | - | 7.824 | - | 28671.081 | - |
| ranibizumab | 251404.609 | 27082.070 | 8.490 | 0.665 | 29611.850 | 40663.769 |
|  | 0 | conbercept | 249247.265 | - | 7.824 | - | 31855.241 | - |
|  | ranibizumab | 279338.454 | 30091.189 | 8.490 | 0.665 | 32903.748 | 45236.924 |
|  | up 10% | conbercept | 274171.992 | - | 7.824 | - | 35042.433 | - |
|  | ranibizumab | 307272.299 | 33100.307 | 8.490 | 0.665 | 36192.261 | 49700.161 |
| Branch Retinal Vein Occlusion | down 10% | conbercept | 233772.658 | - | 8.346 | - | 28010.144 | - |
| ranibizumab | 224325.975 | -9446.683 | 8.297 | -0.049 | 27036.998 | 192789.449 |
|  | 0 | conbercept | 259747.398 | - | 8.346 | - | 31122.862 | - |
|  | ranibizumab | 249251.083 | -10496.315 | 8.297 | -0.049 | 30041.344 | 214491.169 |
|  | up 10% | conbercept | 285722.138 | - | 8.346 | - | 34234.620 | - |
|  | ranibizumab | 274176.191 | -11545.947 | 8.297 | -0.049 | 33045.220 | 235631.571 |
| Central Retinal Vein Occlusion | down 10% | conbercept | 287793.637 | - | 8.156 | - | 35286.125 | - |
| ranibizumab | 311074.804 | 23281.167 | 8.135 | -0.021 | 38239.066 | -1108627.000 |
|  | 0 | conbercept | 319770.708 | - | 8.156 | - | 39208.091 | - |
|  | ranibizumab | 345638.671 | 25867.963 | 8.135 | -0.021 | 42487.873 | -1247442.826 |
|  | up 10% | conbercept | 351747.779 | - | 8.156 | - | 43127.486 | - |
|  | ranibizumab | 380202.538 | 28454.759 | 8.135 | -0.021 | 46736.637 | -1354988.524 |
| Diabetic macular edema | down 10% | conbercept | 276488.936 | - | 6.973 | - | 39649.879 | - |
| ranibizumab | 276611.102 | 122.166 | 6.758 | -0.215 | 40930.375 | -567.761 |
|  | 0 | conbercept | 307209.929 | - | 6.973 | - | 44055.421 | - |
|  | ranibizumab | 307345.669 | 135.740 | 6.758 | -0.215 | 45478.194 | -630.846 |
|  | up 10% | conbercept | 337930.922 | - | 6.973 | - | 48460.963 | - |
|  | ranibizumab | 338080.236 | 149.314 | 6.758 | -0.215 | 50026.014 | -693.931 |
| Pathological myopia | down 10% | conbercept | 252155.079 | - | 7.528 | - | 33497.342 | - |
| ranibizumab | 267197.568 | 15042.489 | 7.499 | -0.028 | 35630.238 | -529019.661 |
|  | 0 | conbercept | 280172.310 | - | 7.528 | - | 37219.269 | - |
|  | ranibizumab | 296886.187 | 16713.877 | 7.499 | -0.028 | 39589.154 | -587799.624 |
|  | up 10% | conbercept | 308189.541 | - | 7.528 | - | 40941.195 | - |
|  | ranibizumab | 326574.806 | 18385.265 | 7.499 | -0.028 | 43548.069 | -646579.586 |


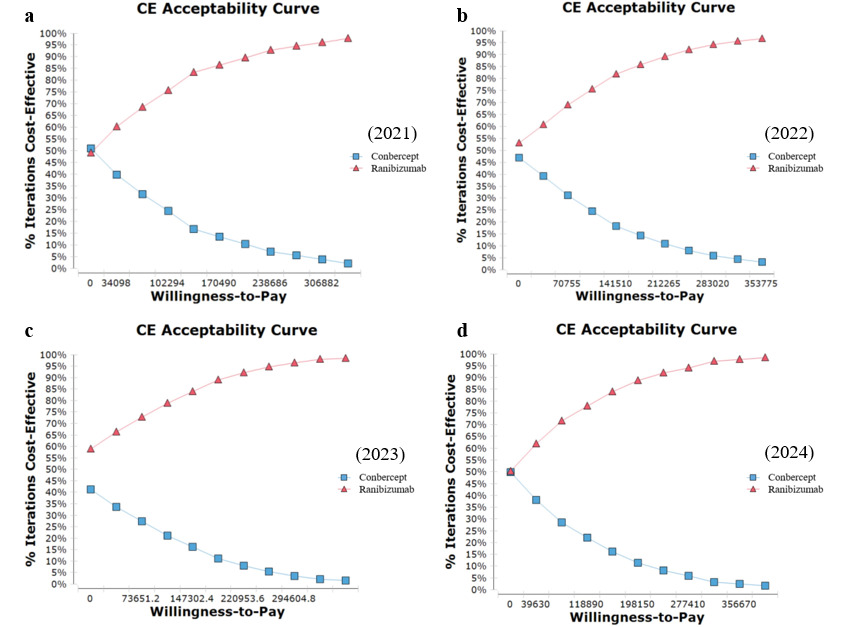


**Figure S1.** The Cost-Effectiveness Acceptability Curve of conbercept and ranibizumab in treatment of AMD from the Perspective of the Whole Society.


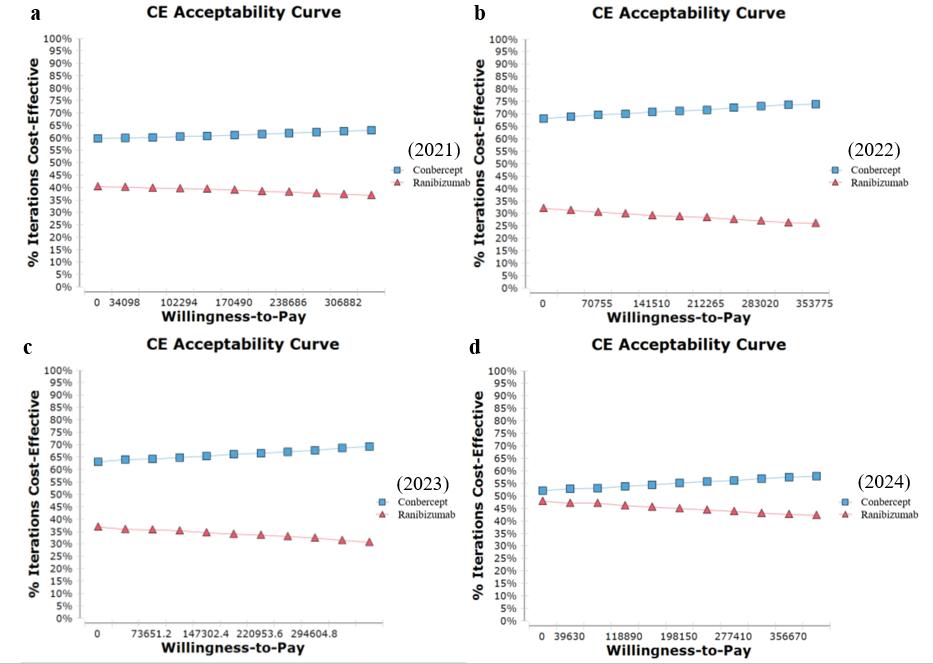


**Figure S2.** The Cost-Effectiveness Acceptability Curve of conbercept and ranibizumab in treatment of BRVO from the Perspective of the Whole Society.


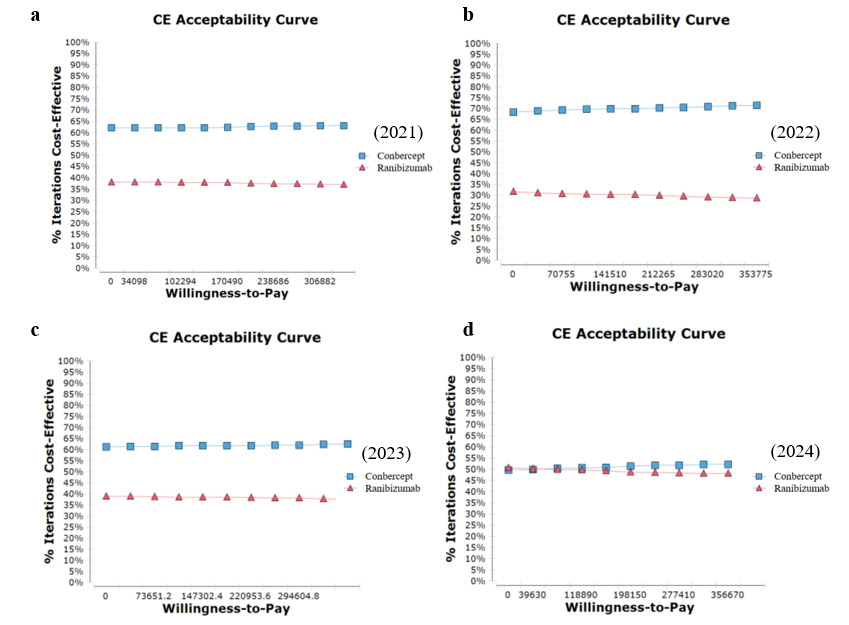


**Figure S3.** The Cost-Effectiveness Acceptability Curve of conbercept and ranibizumab in treatment of CRVO from the Perspective of the Whole Society.


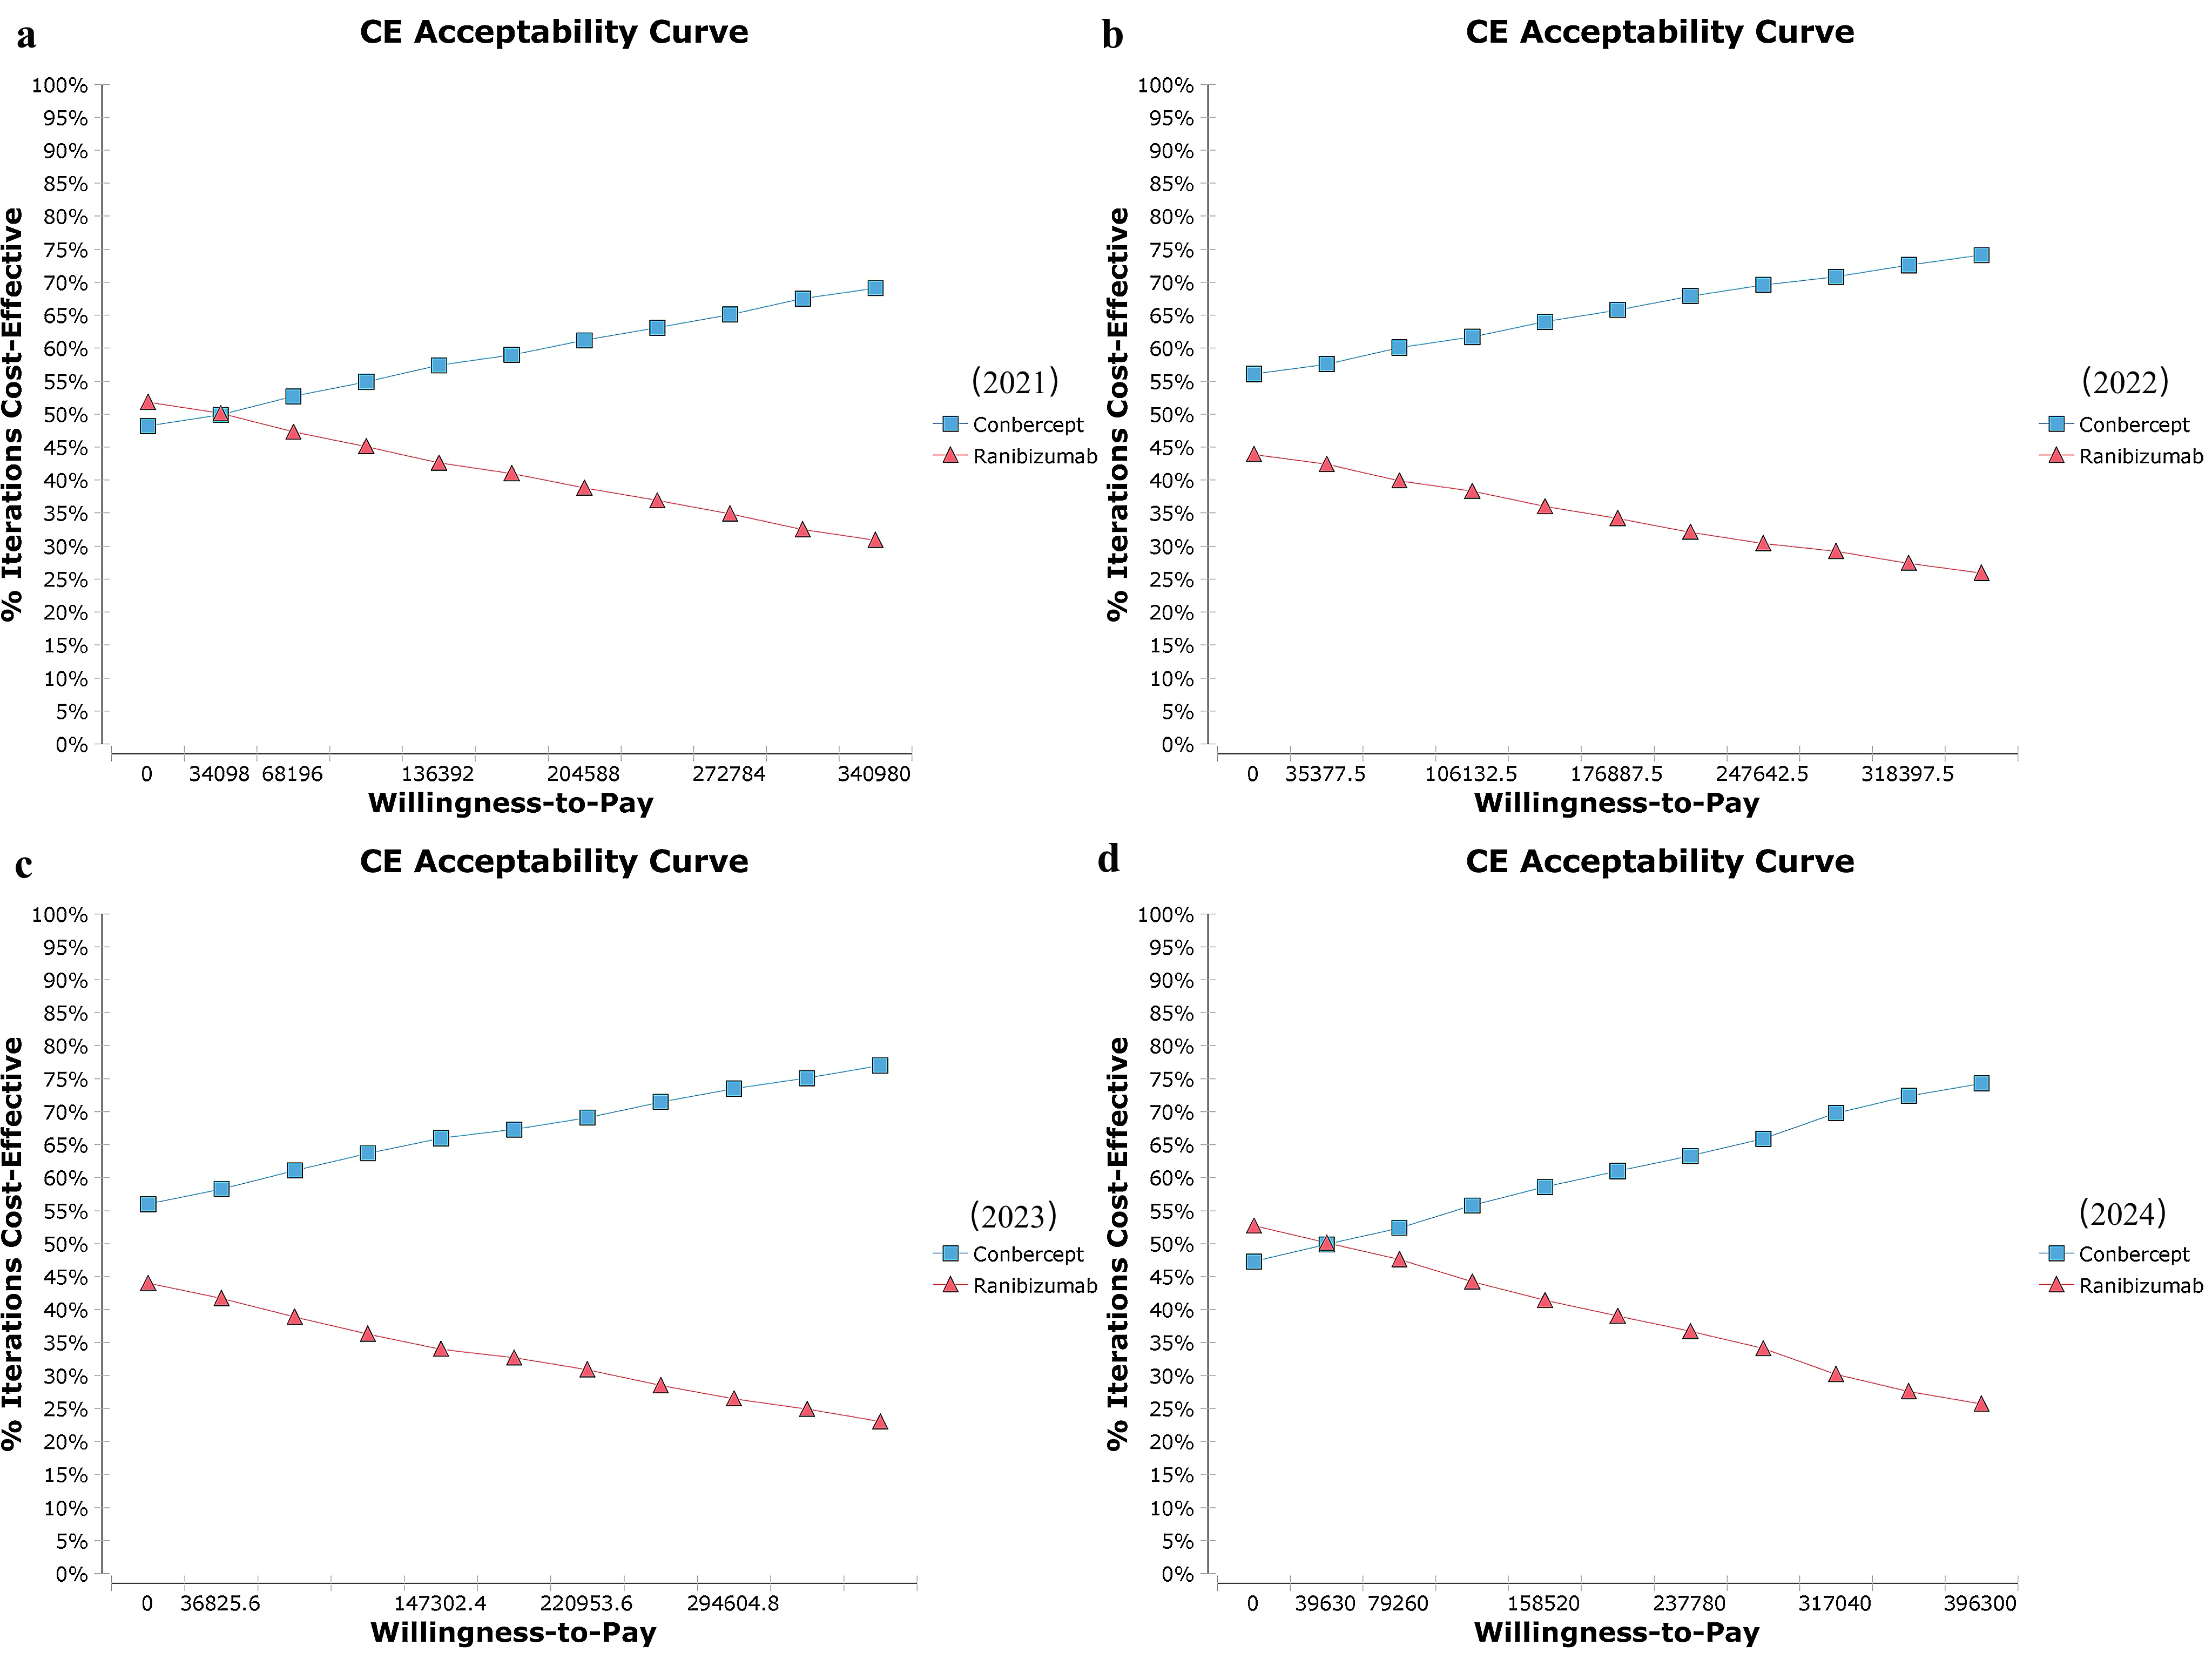


**Figure S4.** The Cost-Effectiveness Acceptability Curve of conbercept and ranibizumab in treatment of DME from the Perspective of the Whole Society.


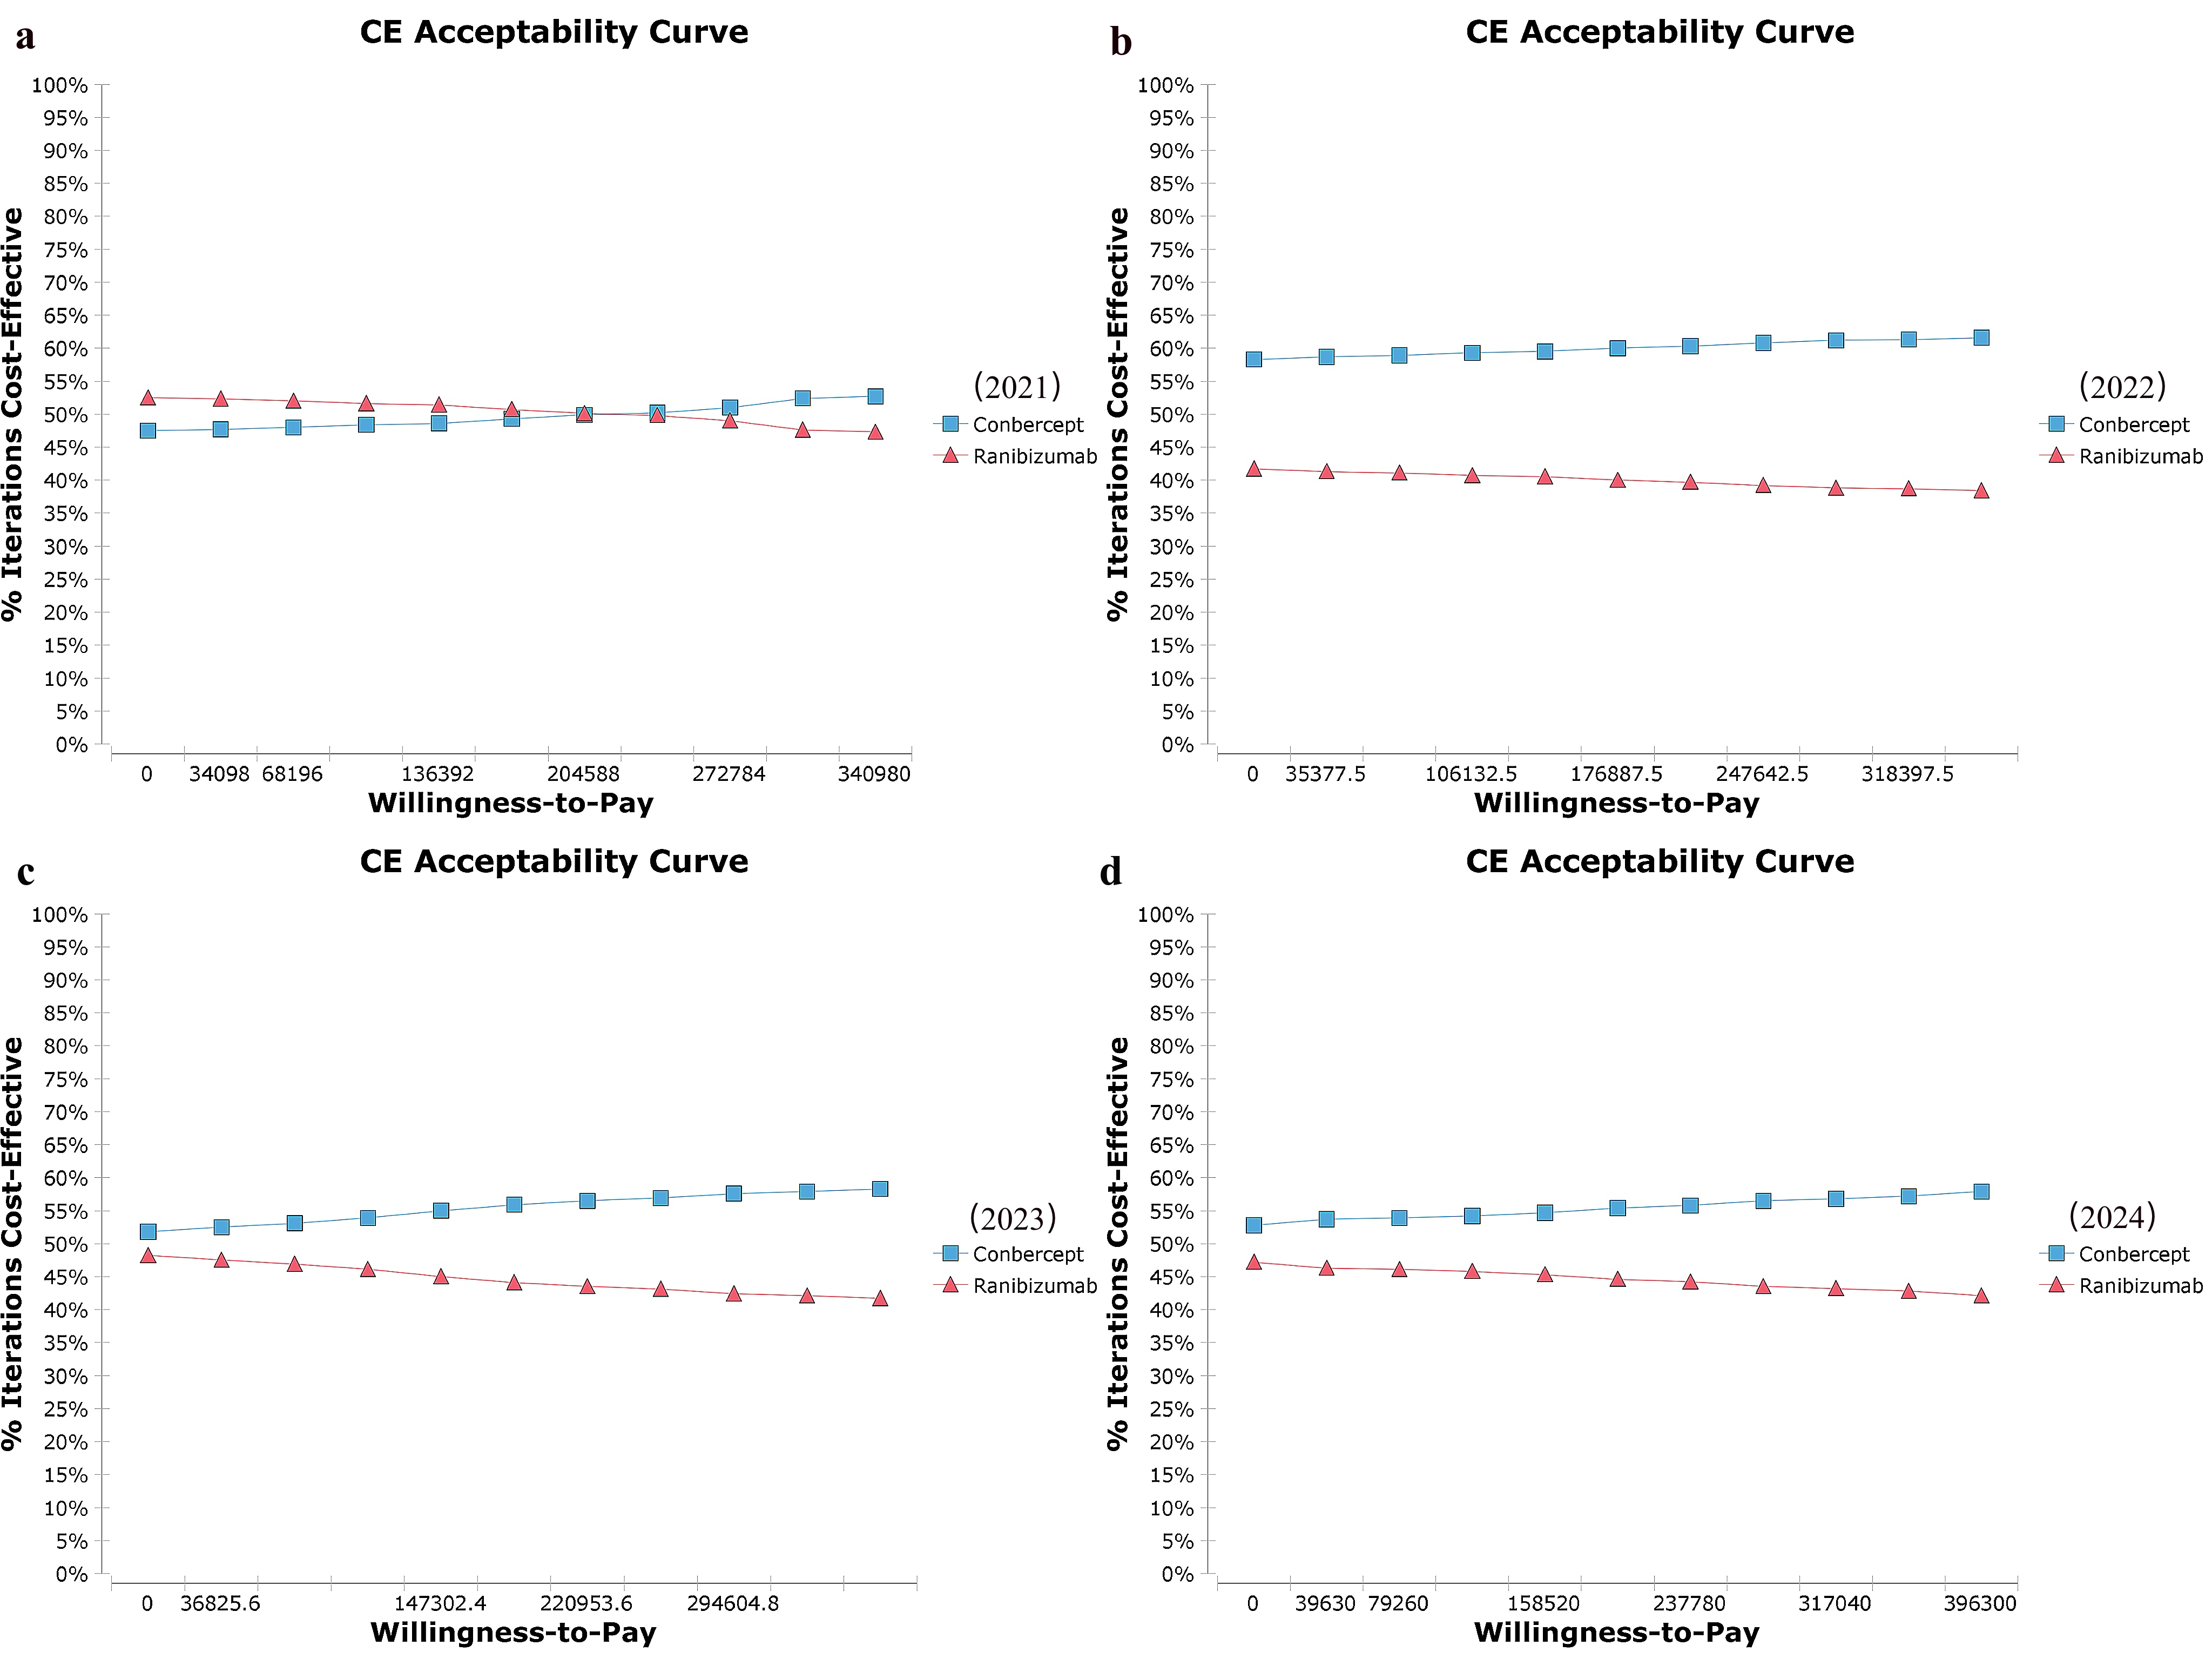


**Figure S5.** The Cost-Effectiveness Acceptability Curve of conbercept and ranibizumab in treatment of PM from the Perspective of the Whole Society

**Table S7.** The Two-way Sensitivity Analysis of Conbercept and Ranibizumab from the Perspective of the Health Insurance Payer in 2021.

|  | Price | Strategy | Cost (RMB) | Incremental costs | Effectiveness (QALYs) | Incremental effectiveness | CER | ICER |
| --- | --- | --- | --- | --- | --- | --- | --- | --- |
| Age-related macular degeneration | down 10% | conbercept | 111057.553 | - | 7.824 | - | 14194.473 | - |
| ranibizumab | 135061.134 | 24003.581 | 8.490 | 0.665 | 15908.261 | 36041.413 |
|  | 0 | conbercept | 123397.281 | - | 7.824 | - | 15770.885 | - |
|  | ranibizumab | 150067.927 | | 26670.646 | | --- | | 8.490 | 0.665 | 17676.755 | 40094.727 |
|  | up 10% | conbercept | 135737.009 | - | 7.824 | - | 17348.800 | - |
|  | ranibizumab | 165074.72 | 29337.711 | 8.490 | 0.665 | 19443.43 | 44050.617 |
| Branch Retinal Vein Occlusion | down 10% | conbercept | 64538.735 |  | 8.346 |  | 7732.894 |  |
| ranibizumab | 179280.257 | 114741.522 | 8.297 | -0.049 | 21607.841 | -2341663.714 |
|  | 0 | conbercept | 71709.705 | - | 8.346 | - | 8592.237 | - |
|  | ranibizumab | 199200.285 | 127490.581 | 8.297 | -0.049 | 24008.900 | -2605257.565 |
|  | up 10% | conbercept | 78880.676 | - | 8.346 | - | 9451.315 | - |
|  | ranibizumab | 219120.314 | 140239.638 | 8.297 | -0.049 | 26409.583 | -2862033.429 |
| Central Retinal Vein Occlusion | down 10% | conbercept | 67671.671 | - | 8.156 | - | 8297.164 | - |
| ranibizumab | 159827.528 | 92155.857 | 8.135 | -0.021 | 19646.9 | -4388374.143 |
|  | 0 | conbercept | 75190.746 | - | 8.156 | - | 9219.374 | - |
|  | ranibizumab | 177586.142 | 102395.396 | 8.135 | -0.021 | 21829.900 | -4937860.836 |
|  | up 10% | conbercept | 82709.821 | - | 8.156 | - | 10140.979 | - |
|  | ranibizumab | 195344.756 | 112634.935 | 8.135 | -0.021 | 24012.877 | -5363568.333 |
| Diabetic macular edema | down 10% | conbercept | 177002.177 | - | 6.973 | - | 25382.987 | - |
| ranibizumab | 161952.570 | -15049.607 | 6.758 | -0.215 | 23964.256 | 69942.278 |
|  | 0 | conbercept | 196669.085 | - | 6.973 | - | 28203.318 | - |
|  | ranibizumab | 179947.300 | -16721.786 | 6.758 | -0.215 | 26626.952 | 77713.642 |
|  | up 10% | conbercept | 216335.994 | - | 6.973 | - | 31023.650 | - |
|  | ranibizumab | 197942.030 | -18393.964 | 6.758 | -0.215 | 29289.647 | 85485.007 |
| Pathological myopia | down 10% | conbercept | 141254.955 | - | 7.528 | - | 18764.903 | - |
| ranibizumab | 126473.751 | -14781.204 | 7.499 | -0.028 | 16865.011 | 519830.687 |
|  | 0 | conbercept | 156949.953 | - | 7.528 | - | 20849.892 | - |
|  | ranibizumab | 140526.395 | -16423.558 | 7.499 | -0.028 | 18738.902 | 577589.580 |
|  | up 10% | conbercept | 172644.945 | - | 7.528 | - | 22934.881 | - |
|  | ranibizumab | 154579.029 | -18065.916 | 7.499 | -0.028 | 20612.791 | 635348.618 |

**Table S8.**TheTwo-way Sensitivity Analysis of Conbercept and Ranibizumab from the Perspective of the Health Insurance Payer in 2022.

|  | Price | Strategy | Cost (RMB) | Incremental costs | Effectiveness (QALYs) | Incremental effectiveness | CER | ICER |
| --- | --- | --- | --- | --- | --- | --- | --- | --- |
| Age-related macular degeneration | down 10% | conbercept | 159734.580 | - | 7.824 | - | 20415.974 | - |
| ranibizumab | 162563.243 | 2828.663 | 8.490 | 0.665 | 19147.614 | 4247.242 |
|  | 0 | conbercept | 177482.867 | - | 7.824 | - | 22683.336 | - |
|  | ranibizumab | 180625.826 | 3142.960 | 8.490 | 0.665 | 21276.221 | 4724.899 |
|  | up 10% | conbercept | 195231.154 | - | 7.824 | - | 24952.857 | - |
|  | ranibizumab | 198688.409 | 3457.255 | 8.490 | 0.665 | 23402.639 | 5191.074 |
| Branch Retinal Vein Occlusion | down 10% | conbercept | 135081.516 | - | 8.346 | - | 16185.18 | - |
| ranibizumab | 171626.899 | 36545.383 | 8.297 | -0.049 | 20685.416 | -745824.143 |
|  | 0 | conbercept | 150090.573 | - | 8.346 | - | 17983.812 | - |
|  | ranibizumab | 190696.554 | 40605.981 | 8.297 | -0.049 | 22983.975 | -829779.261 |
|  | up 10% | conbercept | 165099.630 | - | 8.346 | - | 19781.887 | - |
|  | ranibizumab | 209766.209 | 44666.579 | 8.297 | -0.049 | 25282.175 | -911562.837 |
| Central Retinal Vein Occlusion | down 10% | conbercept | 84592.529 | - | 8.156 | - | 10371.816 | - |
| ranibizumab | 243172.948 | 158580.419 | 8.135 | -0.021 | 29892.188 | -7551448.524 |
|  | 0 | conbercept | 93991.699 | - | 8.156 | - | 11524.617 | - |
|  | ranibizumab | 270192.165 | 176200.467 | 8.135 | -0.021 | 33213.559 | -8496997.088 |
|  | up 10% | conbercept | 103390.869 | - | 8.156 | - | 12676.664 | - |
|  | ranibizumab | 297211.382 | 193820.513 | 8.135 | -0.021 | 36534.896 | -9229548.238 |
| Diabetic macular edema | down 10% | conbercept | 156595.658 | - | 6.973 | - | 22456.591 | - |
| ranibizumab | 172768.208 | 16172.550 | 6.758 | -0.215 | 25564.655 | -75161.098 |
|  | 0 | conbercept | 173995.175 | - | 6.973 | - | 24951.768 | - |
|  | ranibizumab | 191964.675 | 17969.500 | 6.758 | -0.215 | 28405.173 | -83512.331 |
|  | up 10% | conbercept | 191394.693 | - | 6.973 | - | 27446.944 | - |
|  | ranibizumab | 211161.143 | 19766.450 | 6.758 | -0.215 | 31245.690 | -91863.564 |
| Pathological myopia | down 10% | conbercept | 137091.600 | - | 7.528 | - | 18211.825 | - |
| ranibizumab | 146974.140 | 9882.540 | 7.499 | -0.028 | 19598.695 | -347552.713 |
|  | 0 | conbercept | 152323.969 | - | 7.528 | - | 20235.357 | - |
|  | ranibizumab | 163304.587 | 10980.617 | 7.499 | -0.028 | 21776.326 | -386170.296 |
|  | up 10% | conbercept | 167556.400 | - | 7.528 | - | 22258.897 | - |
|  | ranibizumab | 179635.060 | 12078.660 | 7.499 | -0.028 | 23953.960 | -424786.650 |

**Table S9.**The Two-way Sensitivity Analysis of Conbercept and Ranibizumab from the Perspective of the Health Insurance Payer in 2023.

|  | Price | Strategy | Cost (RMB) | Incremental costs | Effectiveness (QALYs) | Incremental effectiveness | CER | ICER |
| --- | --- | --- | --- | --- | --- | --- | --- | --- |
| Age-related macular degeneration | down 10% | conbercept | 161568.409 | - | 7.824 | - | 20650.359 | - |
| ranibizumab | 155951.518 | -5616.891 | 8.490 | 0.665 | 18368.848 | -8433.770 |
|  | 0 | conbercept | 179520.455 | - | 7.824 | - | 22943.751 | - |
|  | ranibizumab | 173279.464 | -6240.991 | 8.490 | 0.665 | 20410.881 | -9382.256 |
|  | up 10% | conbercept | 197472.500 | - | 7.824 | - | 25239.328 | - |
|  | ranibizumab | 190607.410 | -6865.090 | 8.490 | 0.665 | 22450.814 | -10307.943 |
| Branch Retinal Vein Occlusion | down 10% | conbercept | 140229.438 | - | 8.346 | - | 16801.994 | - |
| ranibizumab | 156547.395 | 16317.957 | 8.297 | -0.049 | 18867.952 | -333019.531 |
|  | 0 | conbercept | 155810.487 | - | 8.346 | - | 18669.170 | - |
|  | ranibizumab | 173941.550 | 18131.063 | 8.297 | -0.049 | 20964.554 | -370506.503 |
|  | up 10% | conbercept | 171391.536 | - | 8.346 | - | 20535.77 | - |
|  | ranibizumab | 191335.705 | 19944.169 | 8.297 | -0.049 | 23060.83 | -407023.857 |
| Central Retinal Vein Occlusion | down 10% | conbercept | 135843.081 | - | 8.156 | - | 16655.601 | - |
| ranibizumab | 182334.489 | 46491.408 | 8.135 | -0.021 | 22413.582 | -2213876.571 |
|  | 0 | conbercept | 150936.757 | - | 8.156 | - | 18506.830 | - |
|  | ranibizumab | 202593.877 | 51657.120 | 8.135 | -0.021 | 24903.993 | -2491085.315 |
|  | up 10% | conbercept | 166030.433 | - | 8.156 | - | 20356.846 | - |
|  | ranibizumab | 222853.265 | 56822.832 | 8.135 | -0.021 | 27394.378 | -2705849.143 |
| Diabetic macular edema | down 10% | conbercept | 154705.572 | - | 6.973 | - | 22185.543 | - |
| ranibizumab | 167535.804 | 12830.232 | 6.758 | -0.215 | 24790.412 | -59627.846 |
|  | 0 | conbercept | 171895.080 | - | 6.973 | - | 24650.604 | - |
|  | ranibizumab | 186150.893 | 14255.813 | 6.758 | -0.215 | 27544.902 | -66253.162 |
|  | up 10% | conbercept | 189084.588 | - | 6.973 | - | 27115.664 | - |
|  | ranibizumab | 204765.982 | 15681.395 | 6.758 | -0.215 | 30299.393 | -72878.478 |
| Pathological myopia | down 10% | conbercept | 131056.290 | - | 7.528 | - | 17410.069 | - |
| ranibizumab | 141016.320 | 9960.030 | 7.499 | -0.028 | 18804.232 | -350277.910 |
|  | 0 | conbercept | 145618.124 | - | 7.528 | - | 19344.524 | - |
|  | ranibizumab | 156684.769 | 11066.645 | 7.499 | -0.028 | 20893.587 | -389195.748 |
|  | up 10% | conbercept | 160179.910 | - | 7.528 | - | 21278.973 | - |
|  | ranibizumab | 172353.170 | 12173.260 | 7.499 | -0.028 | 22982.936 | -428113.577 |

**Table S10.**The Two-way Sensitivity Analysis of Conbercept and Ranibizumab from the Perspective of the Health Insurance Payer in 2024.

|  | Price | Strategy | Cost (RMB) | Incremental costs | Effectiveness (QALYs) | Incremental effectiveness | CER | ICER |
| --- | --- | --- | --- | --- | --- | --- | --- | --- |
| Age-related macular degeneration | down 10% | conbercept | 108365.861 | - | 7.824 | - | 13850.442 | - |
| ranibizumab | 140650.478 | 32284.617 | 8.490 | 0.665 | 16566.605 | 48475.401 |
|  | 0 | conbercept | 120406.512 | - | 7.824 | - | 15388.648 | - |
|  | ranibizumab | 156278.309 | 35871.797 | 8.490 | 0.665 | 18408.286 | 53927.073 |
|  | up 10% | conbercept | 132447.163 | - | 7.824 | - | 16928.318 | - |
|  | ranibizumab | 171906.140 | 39458.977 | 8.490 | 0.665 | 20248.073 | 59247.713 |
| Branch Retinal Vein Occlusion | down 10% | conbercept | 142017.384 | - | 8.346 | - | 17016.221 | - |
| ranibizumab | 129634.334 | -12383.05 | 8.297 | -0.049 | 15624.242 | 252715.306 |
|  | 0 | conbercept | 157797.093 | - | 8.346 | - | 18907.205 | - |
|  | ranibizumab | 144038.149 | -13758.944 | 8.297 | -0.049 | 17360.404 | 281162.668 |
|  | up 10% | conbercept | 173576.802 | - | 8.346 | - | 20797.604 | - |
|  | ranibizumab | 158441.964 | -15134.838 | 8.297 | -0.049 | 19096.296 | 308874.245 |
| Central Retinal Vein Occlusion | down 10% | conbercept | 161164.640 | - | 8.156 | - | 19760.255 | - |
| ranibizumab | 180841.867 | 19677.227 | 8.135 | -0.021 | 22230.100 | -937010.810 |
|  | 0 | conbercept | 179071.822 | - | 8.156 | - | 21956.559 | - |
|  | ranibizumab | 200935.408 | 21863.586 | 8.135 | -0.021 | 24700.124 | -1054337.861 |
|  | up 10% | conbercept | 196979.004 | - | 8.156 | - | 24151.423 | - |
|  | ranibizumab | 221028.949 | 24049.945 | 8.135 | -0.021 | 27170.123 | -1145235.476 |
| Diabetic macular edema | down 10% | conbercept | 156695.529 | - | 6.973 | - | 22470.913 | - |
| ranibizumab | 154515.005 | -2180.524 | 6.758 | -0.215 | 22863.714 | 10133.875 |
|  | 0 | conbercept | 174106.144 | - | 6.973 | - | 24967.681 | - |
|  | ranibizumab | 171683.339 | -2422.805 | 6.758 | -0.215 | 25404.126 | 11259.861 |
|  | up 10% | conbercept | 191516.758 | - | 6.973 | - | 27464.449 | - |
|  | ranibizumab | 188851.673 | -2665.085 | 6.758 | -0.215 | 27944.539 | 12385.848 |
| Pathological myopia | down 10% | conbercept | 124587.540 | - | 7.528 | - | 16550.733 | - |
| ranibizumab | 139251.600 | 14664.060 | 7.499 | -0.028 | 18568.910 | -515710.925 |
|  | 0 | conbercept | 138430.550 | - | 7.528 | - | 18389.697 | - |
|  | ranibizumab | 154723.991 | 16293.440 | 7.499 | -0.028 | 20632.121 | -573013.557 |
|  | up 10% | conbercept | 152273.660 | - | 7.528 | - | 20228.674 | - |
|  | ranibizumab | 170196.400 | 17922.740 | 7.499 | -0.028 | 22695.335 | -630313.353 |


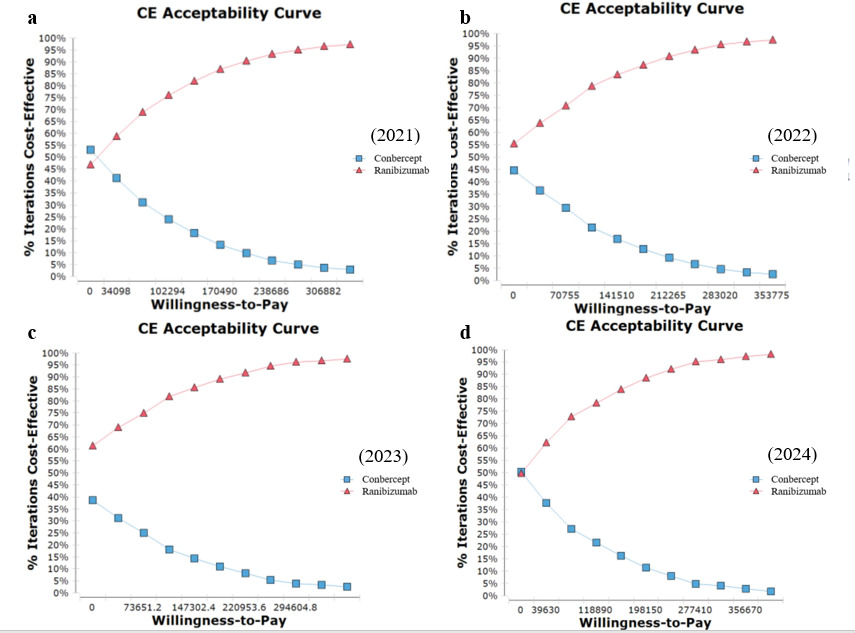


**Figure S6.** The Cost-Effectiveness Acceptability Curve of conbercept and ranibizumab in treatment of AMD from the Perspective of the Health Insurance Payer.


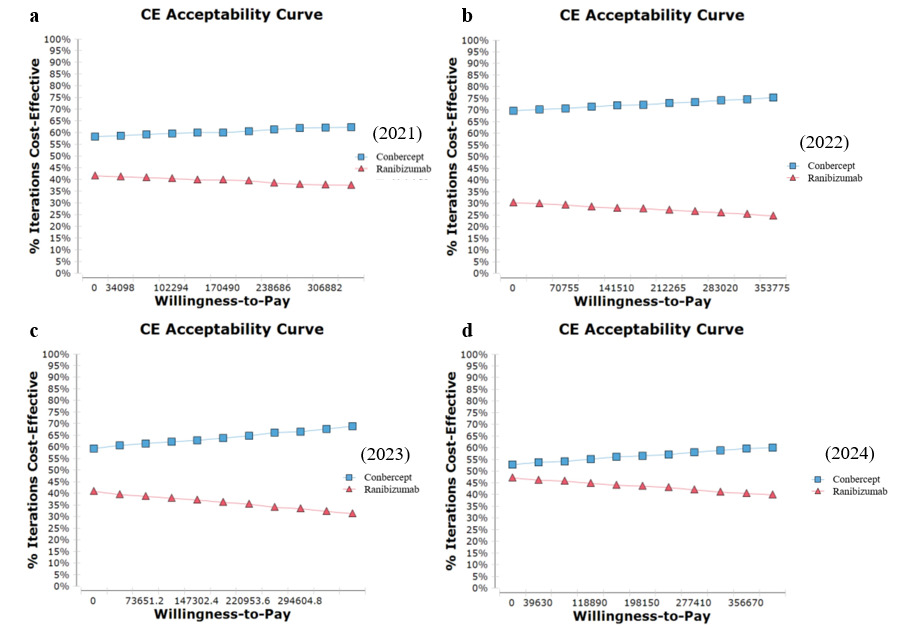


**Figure S7.** The Cost-Effectiveness Acceptability Curve of conbercept and ranibizumab in treatment of BRVO from the Perspective of the Health Insurance Payer.


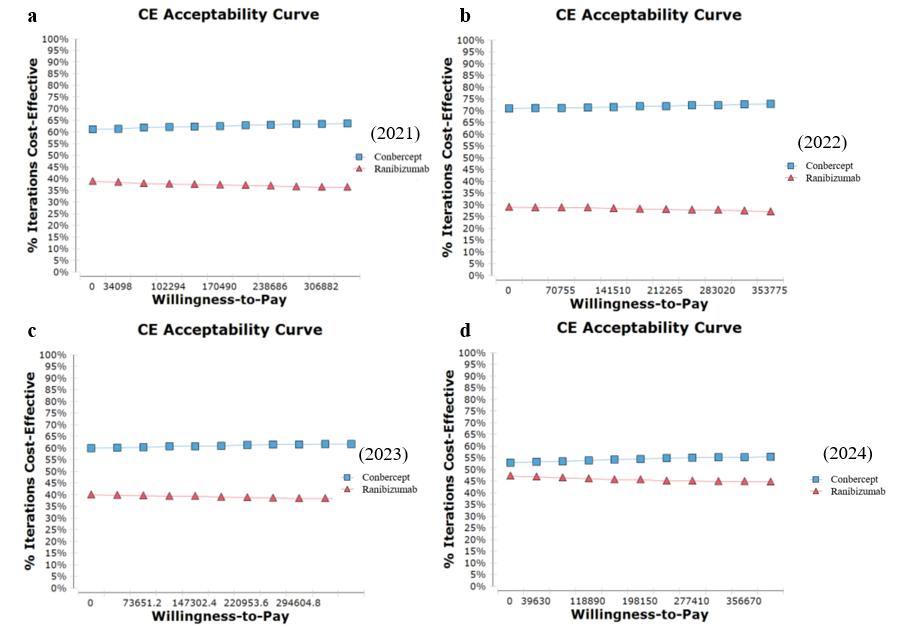


**Figure S8.** The Cost-Effectiveness Acceptability Curve of conbercept and ranibizumab in treatment of CRVO from the Perspective of the Health Insurance Payer.


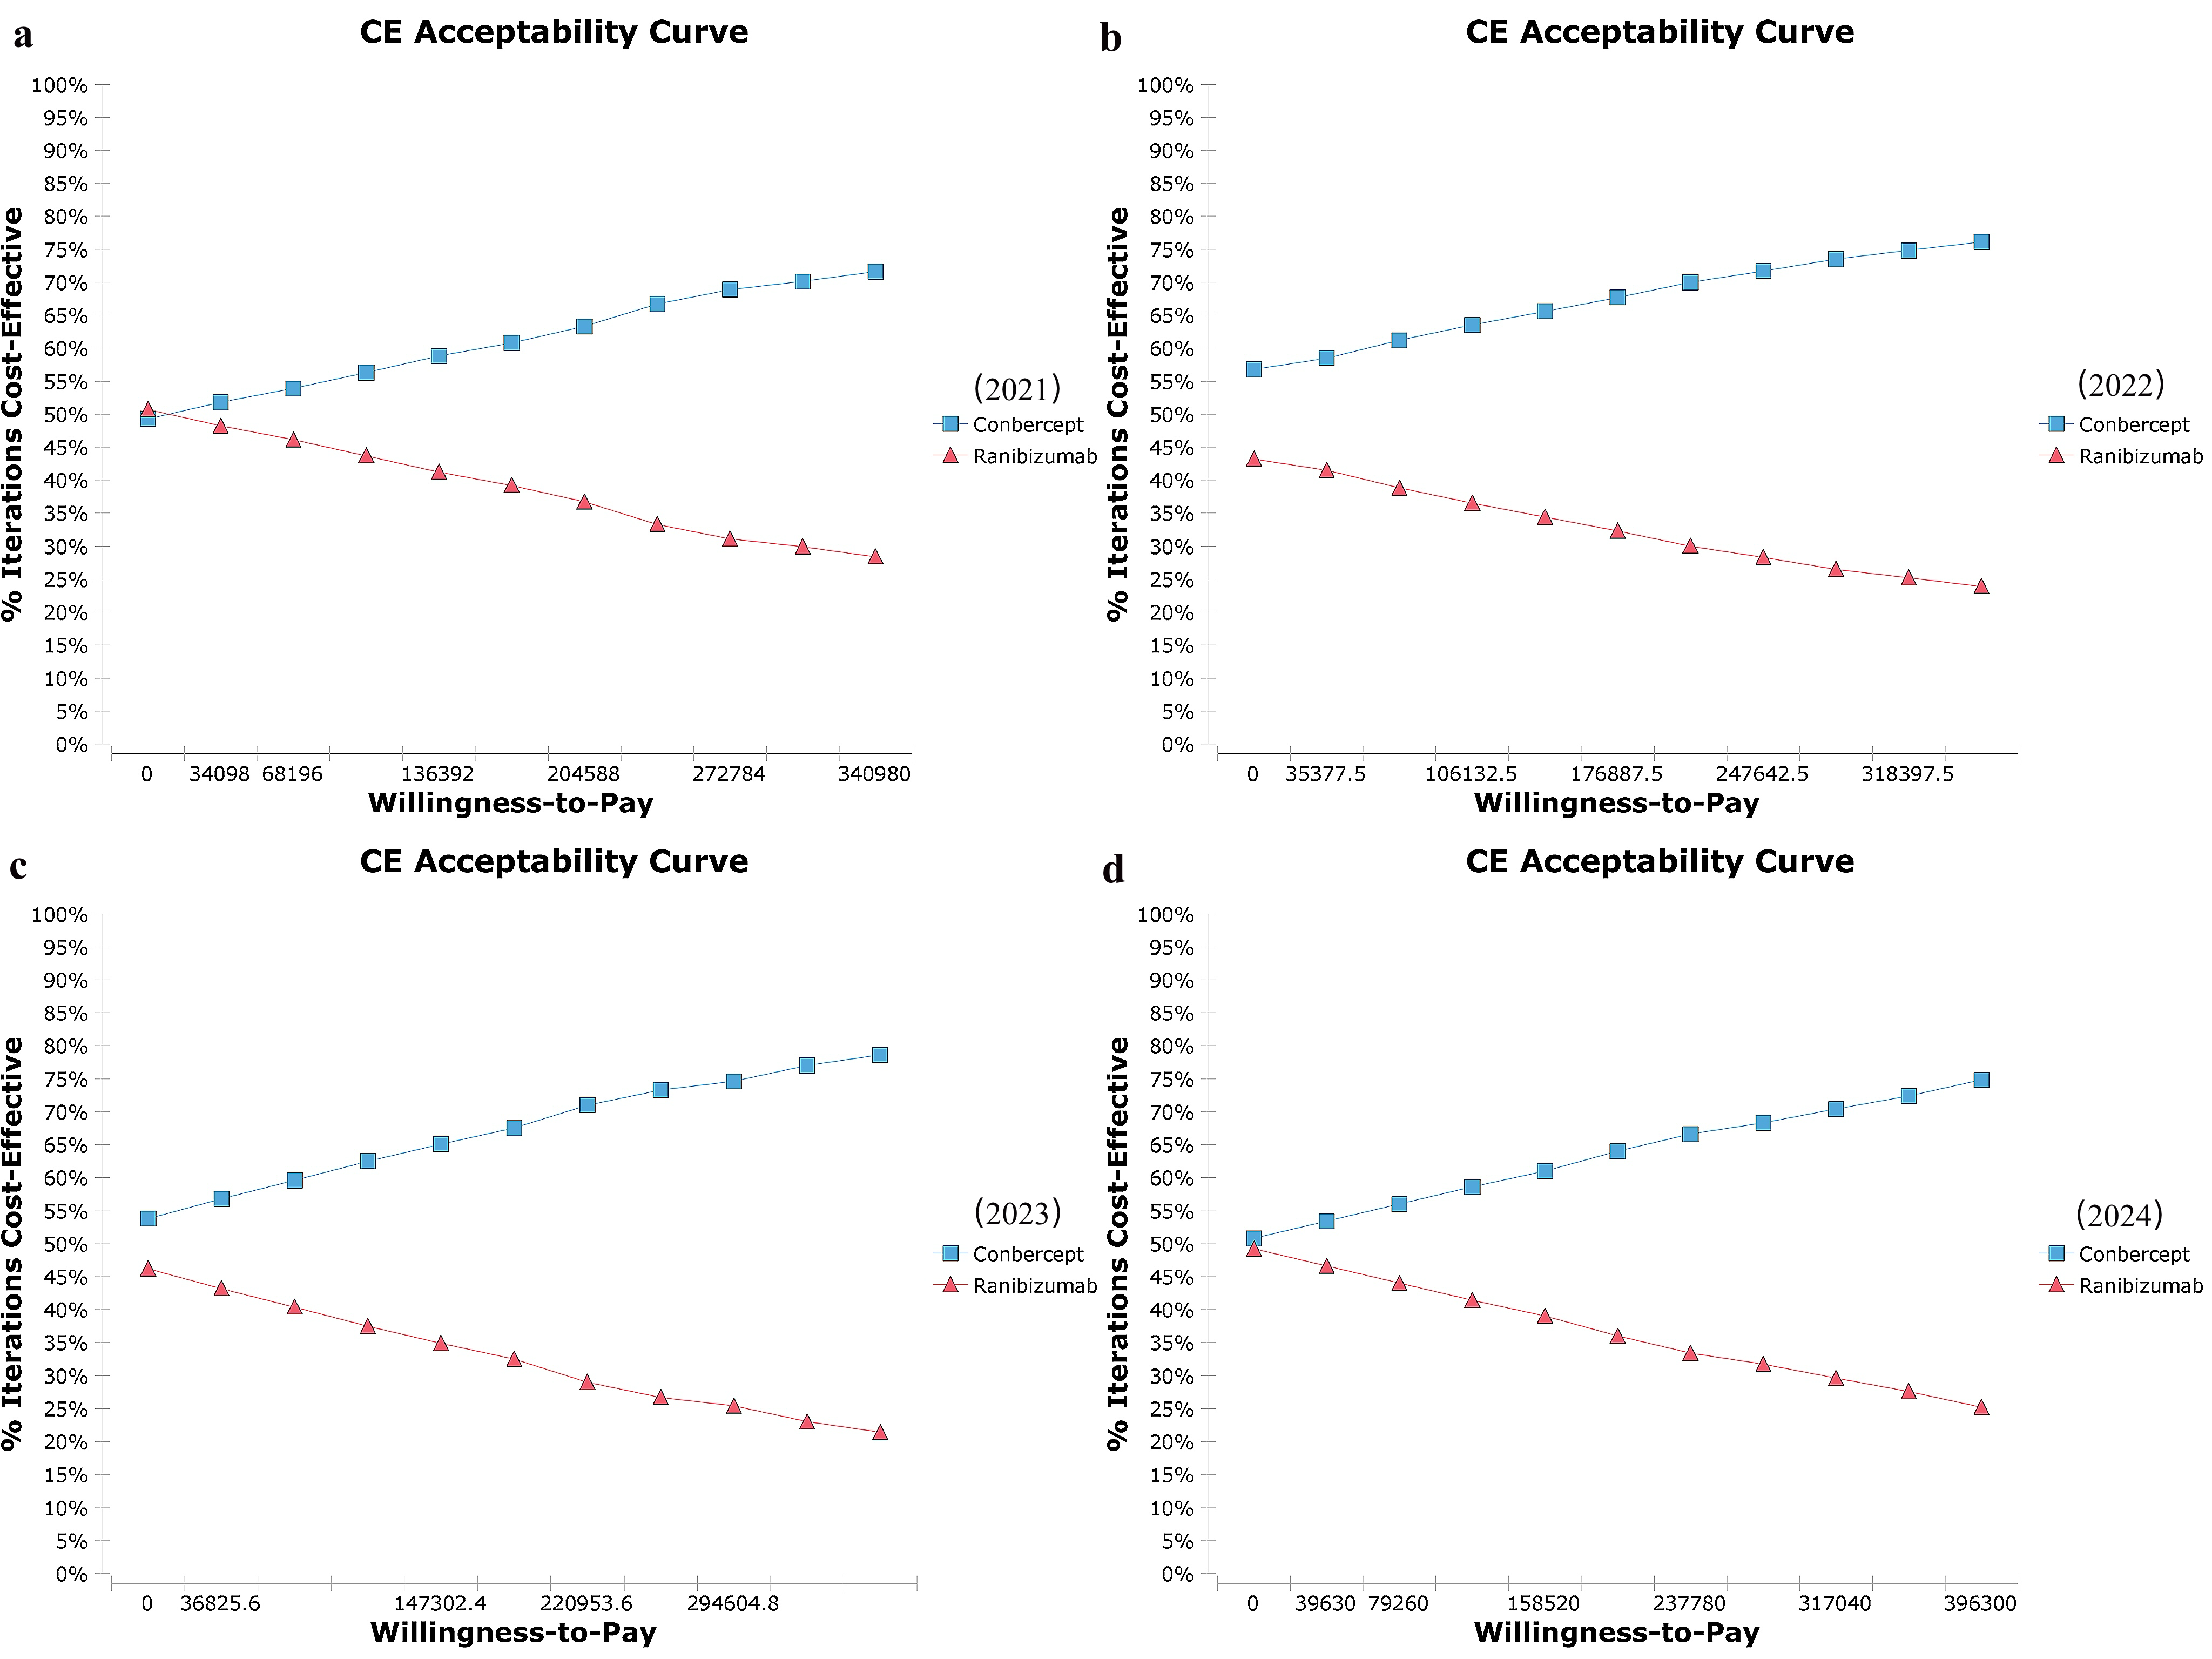


**Figure S8.** The Cost-Effectiveness Acceptability Curve of conbercept and ranibizumab in treatment of DME from the Perspective of the Health Insurance Payer.


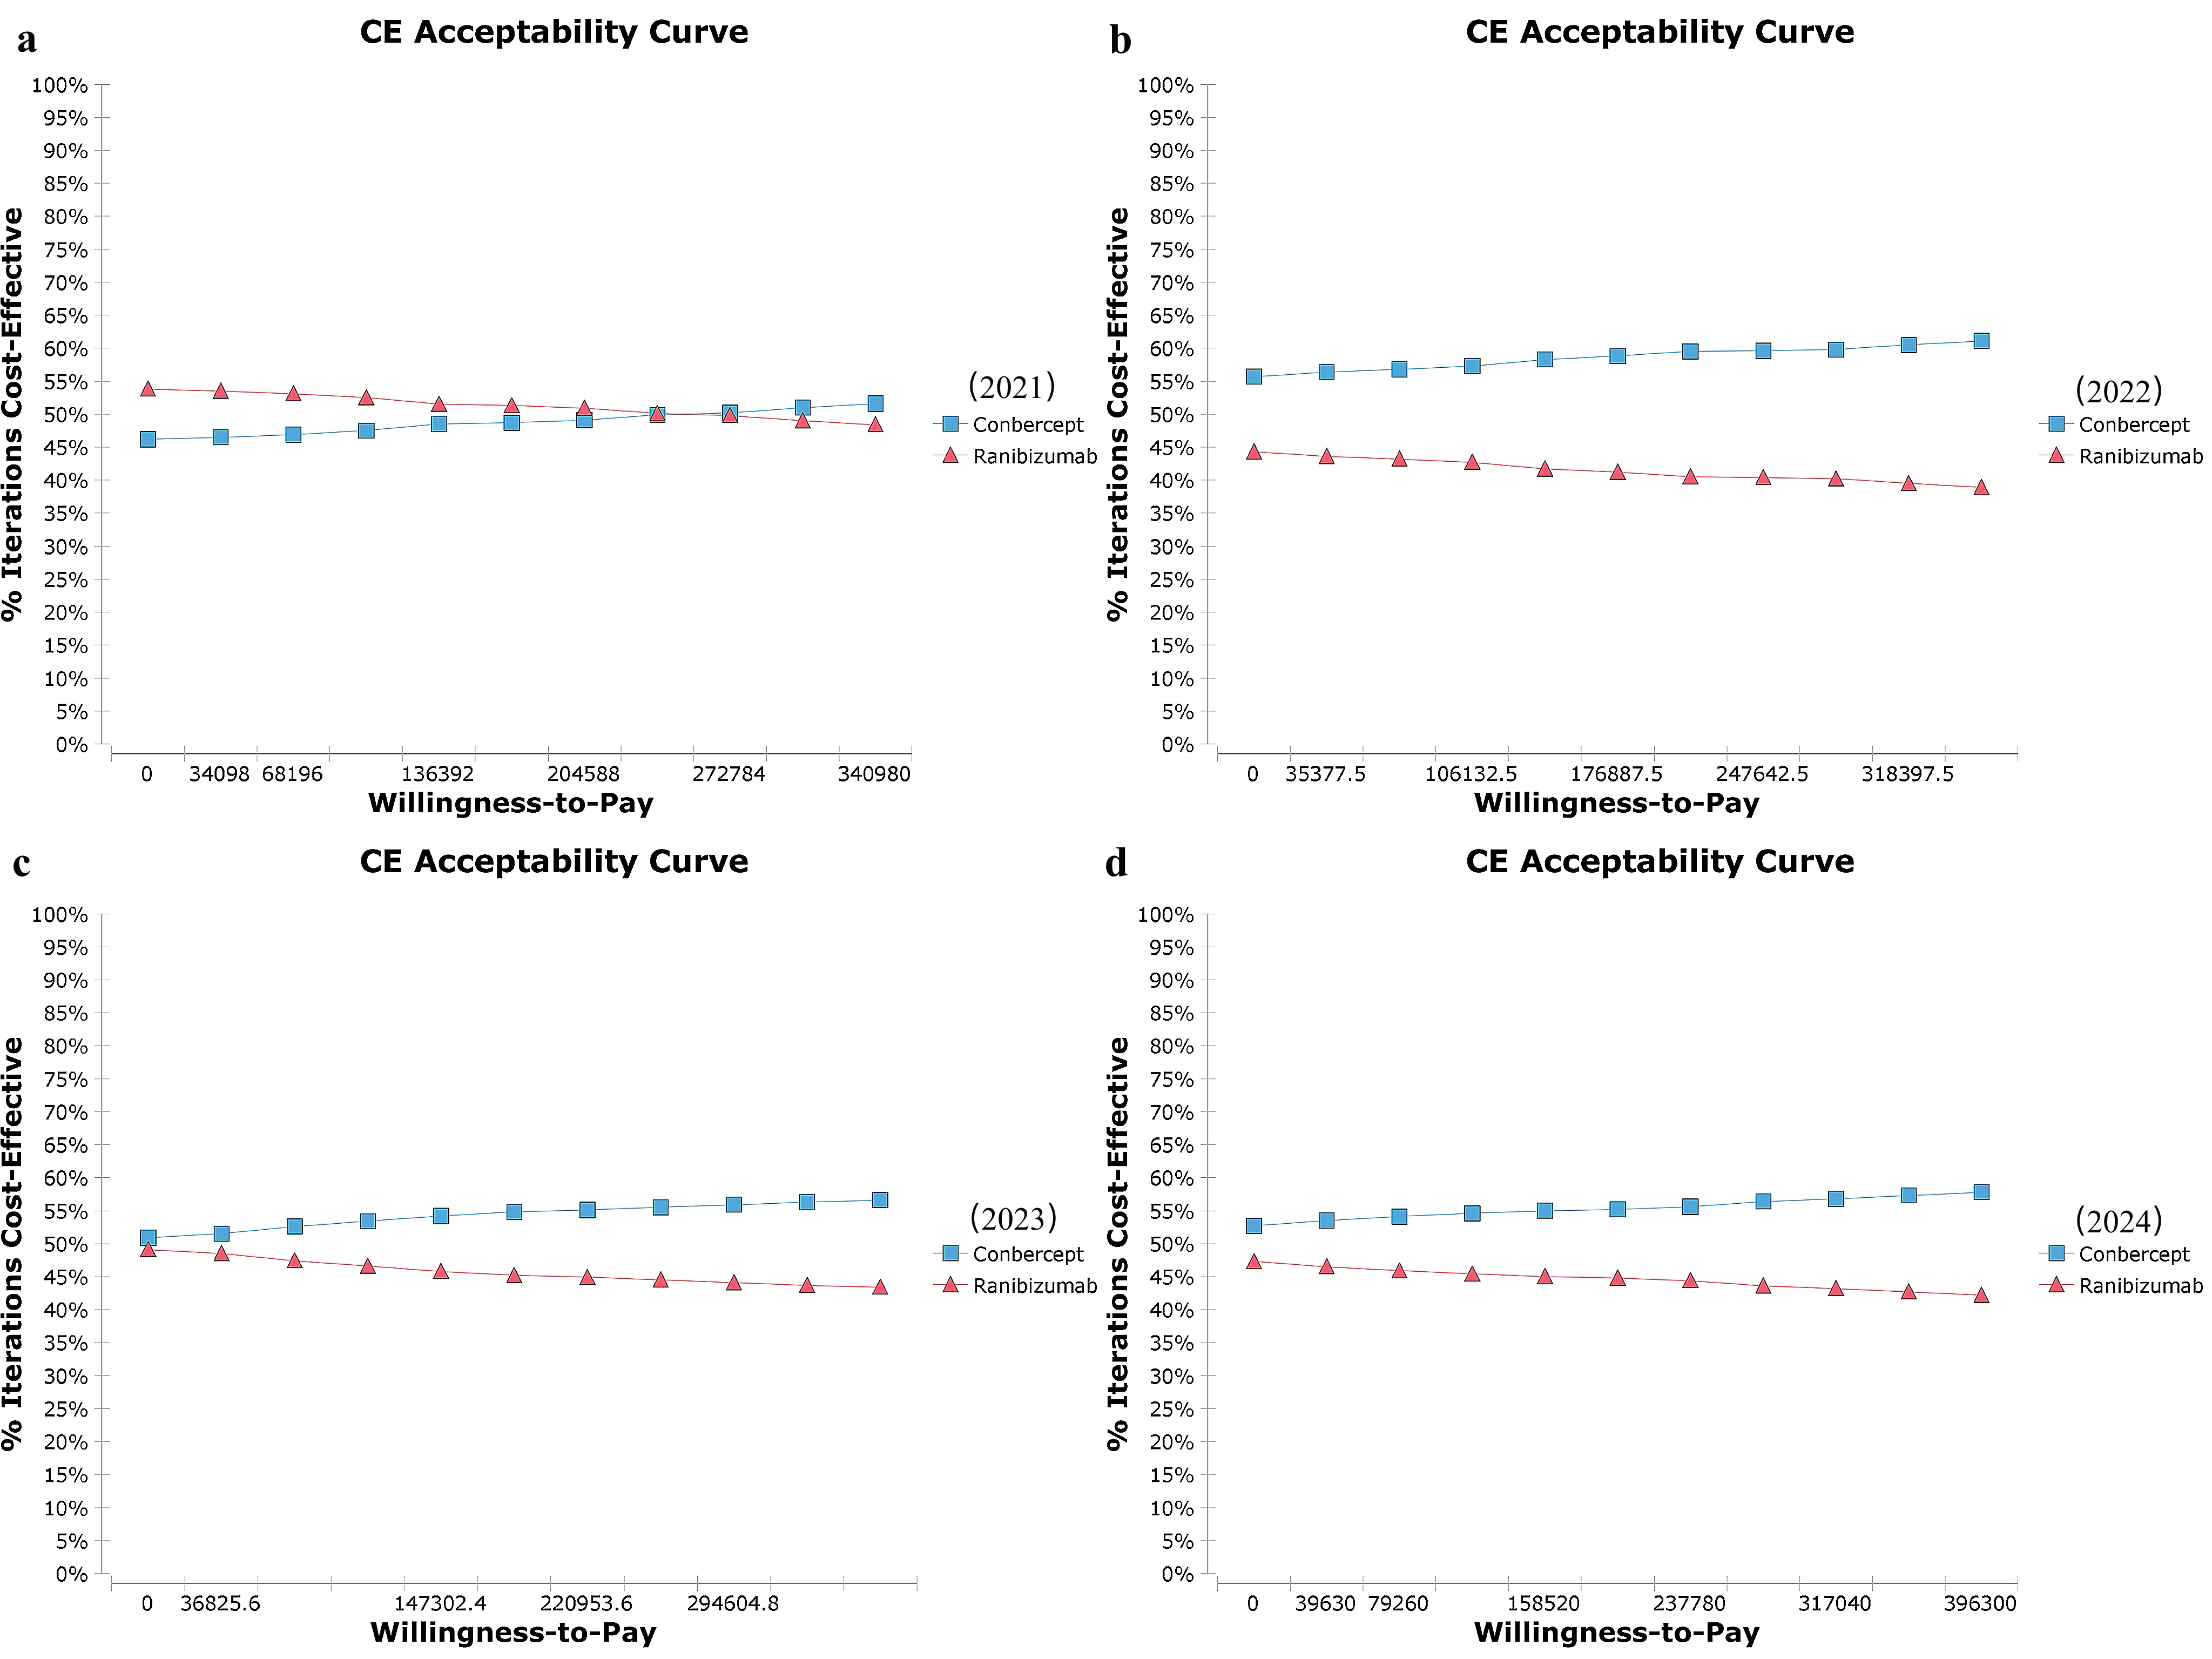


**Figure S9.** The Cost-Effectiveness Acceptability Curve of conbercept and ranibizumab in treatment of PM from the Perspective of the Health Insurance Payer.

**Table S11.** The one-way sensitivity analysis with different numbers of conbercept injections from the Perspective of the Whole Society in 2021.

|  | Number of conbercept injections | Strategy | Cost (RMB) | Incremental costs | Effectiveness (QALYs) | Incremental effectiveness | CER | ICER |
| --- | --- | --- | --- | --- | --- | --- | --- | --- |
| AMD | 1 | Conbercept | 187530.241 | - | 7.824 | - | 23967.448 | - |
| Ranibizumab | 253484.447 | 65954.206 | 8.490 | 0.665 | 29858.361 | 99150.799 |
| 3 | Conbercept | 275313.638 | - | 7.824 | - | 35186.674 | - |
| Ranibizumab | 253484.447 | -21829.190 | 8.490 | 0.665 | 29858.361 | -32816.431 |
| 5 | Conbercept | 363097.035 | - | 7.824 | - | 46405.899 | - |
| Ranibizumab | 253484.447 | -109612.587 | 8.490 | 0.665 | 29858.361 | -164783.662 |
| 7 | Conbercept | 450880.432 | - | 7.824 | - | 57625.124 | - |
| Ranibizumab | 253484.447 | -197395.984 | 8.490 | 0.665 | 29858.361 | -296750.892 |
| 9 | Conbercept | 538663.828 | - | 7.824 | - | 68844.350 | - |
| Ranibizumab | 253484.447 | -285179.381 | 8.490 | 0.665 | 29858.361 | -428718.122 |
| BRVO | 1 | Conbercept | 161535.979 | - | 8.346 | - | 19355.197 | - |
| Ranibizumab | 290374.328 | 128838.350 | 8.297 | -0.049 | 34997.782 | -2632799.096 |
| 2 | Conbercept | 206085.081 | - | 8.346 | - | 24693.058 | - |
| Ranibizumab | 290374.328 | 84289.247 | 8.297 | -0.049 | 34997.782 | -1722442.541 |
| 3 | Conbercept | 250634.183 | - | 8.346 | - | 30030.919 | - |
| Ranibizumab | 290374.328 | 39740.145 | 8.297 | -0.049 | 34997.782 | -812085.987 |
| 4 | Conbercept | 295183.285 | - | 8.346 | - | 35368.781 | - |
| Ranibizumab | 290374.328 | -4808.957 | 8.297 | -0.049 | 34997.782 | 98270.568 |
| 5 | Conbercept | 339732.388 | - | 8.346 | - | 40706.642 | - |
| Ranibizumab | 290374.328 | -49358.059 | 8.297 | -0.049 | 34997.782 | 1008627.123 |
| CRVO | 1 | Conbercept | 194280.717 | - | 8.156 | - | 23821.369 | - |
| Ranibizumab | 297591.762 | 103311.045 | 8.135 | -0.021 | 36581.674 | -4982016.597 |
| 2.25 | Conbercept | 249967.095 | - | 8.156 | - | 30649.251 | - |
| Ranibizumab | 297591.762 | 47624.667 | 8.135 | -0.021 | 36581.674 | -2296626.494 |
| 3.5 | Conbercept | 305653.472 | - | 8.156 | - | 37477.133 | - |
| Ranibizumab | 297591.762 | -8061.710 | 8.135 | -0.021 | 36581.674 | 388763.610 |
| 4.75 | Conbercept | 361339.850 | - | 8.156 | - | 44305.014 | - |
| Ranibizumab | 297591.762 | -63748.088 | 8.135 | -0.021 | 36581.674 | 3074153.714 |
| 6 | Conbercept | 417026.228 | - | 8.135 | - | 51132.896 | - |
| Ranibizumab | 297591.762 | -119434.466 | 8.156 | -0.021 | 36581.674 | 5759543.818 |
| DME | 1 | Conbercept | 241348.872 | - | 6.973 | - | 34610.621 | - |
| Ranibizumab | 296383.430 | 55034.558 | 6.758 | -0.215 | 43856.103 | -255770.287 |
| 3.75 | Conbercept | 362312.578 | - | 6.973 | - | 51957.413 | - |
| Ranibizumab | 296383.430 | -65929.148 | 6.758 | -0.215 | 43856.103 | 306402.338 |
| 6.5 | Conbercept | 483276.284 | - | 6.973 | - | 69304.206 | - |
| Ranibizumab | 296383.430 | -186892.854 | 6.758 | -0.215 | 43856.103 | 868574.962 |
| 9.25 | Conbercept | 604239.990 | - | 6.973 | - | 86650.999 | - |
| Ranibizumab | 296383.430 | -307856.560 | 6.758 | -0.215 | 43856.103 | 1430747.587 |
| 12 | Conbercept | 725203.695 | - | 6.973 | - | 103997.792 | - |
| Ranibizumab | 296383.430 | -428820.265 | 6.758 | -0.215 | 43856.103 | 1992920.212 |
| PM | 1 | Conbercept | 220470.512 | - | 7.528 | - | 29288.231 | - |
| Ranibizumab | 266591.723 | 46121.211 | 7.499 | -0.028 | 35549.450 | -1622007.284 |
| 3.25 | Conbercept | 320335.820 | - | 7.528 | - | 42554.758 | - |
| Ranibizumab | 266591.723 | -53744.097 | 7.499 | -0.028 | 35549.450 | 1890091.697 |
| 5.5 | Conbercept | 420201.128 | - | 7.528 | - | 55821.286 | - |
| Ranibizumab | 266591.723 | -153609.405 | 7.499 | -0.028 | 35549.450 | 5402190.678 |
| 7.75 | Conbercept | 520066.436 | - | 7.528 | - | 69087.814 | - |
| Ranibizumab | 266591.723 | -253474.713 | 7.499 | -0.028 | 35549.450 | 8914289.659 |
| 10 | Conbercept | 619931.743 | - | 7.528 | - | 82354.341 | - |
| Ranibizumab | 266591.723 | -353340.020 | 7.499 | -0.028 | 35549.450 | 12428421.394 |

**Table S12.** The one-way sensitivity analysis with different numbers of ranibizumab injections from the Perspective of the Whole Society in 2021.

|  | Number of ranibizumab injections | Strategy | Cost (RMB) | Incremental costs | Effectiveness (QALYs) | Incremental effectiveness | CER | ICER |
| --- | --- | --- | --- | --- | --- | --- | --- | --- |
| AMD | 1 | Conbercept | 225277.102 | - | 7.824 | - | 28791.715 | - |
| Ranibizumab | 197225.142 | -28051.959 | 8.490 | 0.665 | 23231.483 | -42171.293 |
| 3 | Conbercept | 225277.102 | - | 7.824 | - | 28791.715 | - |
| Ranibizumab | 281825.601 | 56548.499 | 8.490 | 0.665 | 33196.714 | 85010.937 |
| 5 | Conbercept | 225277.102 | - | 7.824 | - | 28791.715 | - |
| Ranibizumab | 366426.060 | 141148.958 | 8.490 | 0.665 | 43161.945 | 212193.168 |
| 7 | Conbercept | 225277.102 | - | 7.824 | - | 28791.715 | - |
| Ranibizumab | 451026.518 | 225749.417 | 8.490 | 0.665 | 53127.176 | 339375.398 |
| 9 | Conbercept | 225277.102 | - | 7.824 | - | 28791.715 | - |
| Ranibizumab | 535626.977 | 310349.875 | 8.490 | 0.665 | 63092.406 | 466557.629 |
| BRVO | 1 | Conbercept | 161535.979 | - | 8.346 | - | 19355.197 | - |
| Ranibizumab | 207042.877 | 45506.898 | 8.297 | -0.049 | 24954.139 | -929929.017 |
| 2.75 | Conbercept | 161535.979 | - | 8.346 | - | 19355.197 | - |
| Ranibizumab | 281068.278 | 119532.299 | 8.297 | -0.049 | 33876.157 | -2442630.864 |
| 4.5 | Conbercept | 161535.979 | - | 8.346 | - | 19355.197 | - |
| Ranibizumab | 355093.679 | 193557.701 | 8.297 | -0.049 | 42798.174 | -3955332.711 |
| 6.25 | Conbercept | 161535.979 | - | 8.346 | - | 19355.197 | - |
| Ranibizumab | 429119.081 | 267583.102 | 8.297 | -0.049 | 51720.192 | -5468034.558 |
| 8 | Conbercept | 161535.979 | - | 8.346 | - | 19355.197 | - |
| Ranibizumab | 503144.482 | 341608.503 | 8.297 | -0.049 | 60642.209 | -6980736.405 |
| CRVO | 1 | Conbercept | 194280.717 | - | 8.156 | - | 23821.369 | - |
| Ranibizumab | 225258.370 | 30977.653 | 8.135 | -0.021 | 27690.041 | -1493849.779 |
| 2.75 | Conbercept | 194280.717 | - | 8.156 | - | 23821.369 | - |
| Ranibizumab | 299283.771 | 105003.054 | 8.135 | -0.021 | 36789.665 | -5063611.143 |
| 4.5 | Conbercept | 194280.717 | - | 8.156 | - | 23821.369 | - |
| Ranibizumab | 373309.173 | 179028.456 | 8.135 | -0.021 | 45889.289 | -8633372.507 |
| 6.25 | Conbercept | 194280.717 | - | 8.156 | - | 23821.369 | - |
| Ranibizumab | 447334.574 | 253053.857 | 8.135 | -0.021 | 54988.913 | -12203133.870 |
| 8 | Conbercept | 194280.717 | - | 8.156 | - | 23821.369 | - |
| Ranibizumab | 521359.975 | 327079.258 | 8.135 | -0.021 | 64088.536 | -15772895.234 |
| DME | 1 | Conbercept | 318325.776 | - | 6.973 | - | 45649.489 | - |
| Ranibizumab | 219820.015 | -98505.761 | 6.758 | -0.215 | 32526.950 | 457800.477 |
| 3.75 | Conbercept | 318325.776 | - | 6.973 | - | 45649.489 | - |
| Ranibizumab | 336145.646 | 17819.870 | 6.758 | -0.215 | 49739.751 | -82816.931 |
| 6.5 | Conbercept | 318325.776 | - | 6.973 | - | 45649.489 | - |
| Ranibizumab | 452471.276 | 134145.500 | 6.758 | -0.215 | 66952.551 | -623434.339 |
| 9.25 | Conbercept | 318325.776 | - | 6.973 | - | 45649.489 | - |
| Ranibizumab | 568796.907 | 250471.131 | 6.758 | -0.215 | 84165.351 | -1164051.747 |
| 12 | Conbercept | 318325.776 | - | 6.973 | - | 45649.489 | - |
| Ranibizumab | 685122.537 | 366796.761 | 6.758 | -0.215 | 101378.152 | -1704669.155 |
| PM | 1 | Conbercept | 280833.543 | - | 7.528 | - | 37307.110 | - |
| Ranibizumab | 217100.455 | -63733.088 | 7.499 | -0.028 | 28949.893 | 2241388.119 |
| 2.25 | Conbercept | 280833.543 | - | 7.528 | - | 37307.110 | - |
| Ranibizumab | 269975.741 | -10857.802 | 7.499 | -0.028 | 36000.702 | 381851.062 |
| 3.5 | Conbercept | 280833.543 | - | 7.528 | - | 37307.110 | - |
| Ranibizumab | 322851.028 | 42017.485 | 7.499 | -0.028 | 43051.511 | -1477685.995 |
| 4.75 | Conbercept | 280833.543 | - | 7.528 | - | 37307.110 | - |
| Ranibizumab | 375726.315 | 94892.772 | 7.499 | -0.028 | 50102.320 | -3337223.052 |
| 6 | Conbercept | 280833.543 | - | 7.528 | - | 37307.110 | - |
| Ranibizumab | 428601.601 | 147768.058 | 7.499 | -0.028 | 57153.129 | -5196760.108 |

**Table S13.** The one-way sensitivity analysis with different numbers of conbercept injections from the Perspective of the Whole Society in 2022.

|  | Number ofconbercept injections | Strategy | Cost (RMB) | Incremental costs | Effectiveness (QALYs) | Incremental effectiveness | CER | ICER |
| --- | --- | --- | --- | --- | --- | --- | --- | --- |
| AMD | 1 | Conbercept | 206373.697 | - | 7.824 | - | 26375.751 | - |
| Ranibizumab | 290851.809 | 84478.113 | 8.490 | 0.665 | 34259.926 | 126998.305 |
| 3 | Conbercept | 279233.916 | - | 7.824 | - | 35687.708 | - |
| Ranibizumab | 290851.809 | 11617.893 | 8.490 | 0.665 | 34259.926 | 17465.503 |
| 5 | Conbercept | 352094.135 | - | 7.824 | - | 44999.665 | - |
| Ranibizumab | 290851.809 | -61242.326 | 8.490 | 0.665 | 34259.926 | -92067.298 |
| 7 | Conbercept | 424954.355 | - | 7.824 | - | 54311.622 | - |
| Ranibizumab | 290851.809 | -134102.545 | 8.490 | 0.665 | 34259.926 | -201600.099 |
| 9 | Conbercept | 497814.574 | - | 7.824 | - | 63623.579 | - |
| Ranibizumab | 290851.809 | -206962.765 | 8.490 | 0.665 | 34259.926 | -311132.900 |
| BRVO | 1 | Conbercept | 201399.999 | - | 8.346 | - | 24131.693 | - |
| Ranibizumab | 287032.788 | 85632.789 | 8.297 | -0.049 | 34595.038 | -1749897.676 |
| 2 | Conbercept | 238375.754 | - | 8.346 | - | 28562.118 | - |
| Ranibizumab | 287032.788 | 48657.034 | 8.297 | -0.049 | 34595.038 | -994301.736 |
| 3 | Conbercept | 275351.509 | - | 8.346 | - | 32992.543 | - |
| Ranibizumab | 287032.788 | 11681.279 | 8.297 | -0.049 | 34595.038 | -238705.795 |
| 4 | Conbercept | 312327.264 | - | 8.346 | - | 34595.038 | - |
| Ranibizumab | 287032.788 | -25294.476 | 8.297 | -0.049 | 37422.968 | 516890.145 |
| 5 | Conbercept | 349303.019 | - | 8.346 | - | 34595.038 | - |
| Ranibizumab | 287032.788 | -62270.231 | 8.297 | -0.049 | 41853.392 | 1272486.086 |
| CRVO | 1 | Conbercept | 218632.826 | - | 8.156 | - | 26807.258 | - |
| Ranibizumab | 402782.713 | 184149.887 | 8.135 | -0.021 | 49512.344 | -8880345.683 |
| 2.25 | Conbercept | 264852.520 | - | 8.156 | - | 32474.400 | - |
| Ranibizumab | 402782.713 | 137930.194 | 8.135 | -0.021 | 49512.344 | -6651471.896 |
| 3.5 | Conbercept | 311072.213 | - | 8.156 | - | 38141.541 | - |
| Ranibizumab | 402782.713 | 91710.500 | 8.135 | -0.021 | 49512.344 | -4422598.110 |
| 4.75 | Conbercept | 357291.907 | - | 8.156 | - | 43808.683 | - |
| Ranibizumab | 402782.713 | 45490.807 | 8.135 | -0.021 | 49512.344 | -2193724.324 |
| 6 | Conbercept | 403511.600 | - | 8.135 | - | 49512.344 | - |
| Ranibizumab | 402782.713 | -728.887 | 8.156 | -0.021 | 49475.825 | 35149.462 |
| DME | 1 | Conbercept | 233005.809 | - | 6.973 | - | 33414.184 | - |
| Ranibizumab | 315143.393 | 82137.584 | 6.758 | -0.215 | 46632.030 | -381730.213 |
| 3.75 | Conbercept | 333405.685 | - | 6.973 | - | 47812.022 | - |
| Ranibizumab | 315143.393 | -18262.292 | 6.758 | -0.215 | 46632.030 | 84873.066 |
| 6.5 | Conbercept | 433805.560 | - | 6.973 | - | 62209.860 | - |
| Ranibizumab | 315143.393 | -118662.168 | 6.758 | -0.215 | 46632.030 | 551476.344 |
| 9.25 | Conbercept | 534205.436 | - | 6.973 | - | 76607.698 | - |
| Ranibizumab | 315143.393 | -219062.043 | 6.758 | -0.215 | 46632.030 | 1018079.623 |
| 12 | Conbercept | 634605.312 | - | 6.973 | - | 91005.537 | - |
| Ranibizumab | 315143.393 | -319461.919 | 6.758 | -0.215 | 46632.030 | 1484682.901 |
| PM | 1 | Conbercept | 222307.476 | - | 7.528 | - | 29532.261 | - |
| Ranibizumab | 295725.599 | 73418.123 | 7.499 | -0.028 | 39434.392 | -2581994.882 |
| 3.25 | Conbercept | 305195.682 | - | 7.528 | - | 40543.479 | - |
| Ranibizumab | 295725.599 | -9470.083 | 7.499 | -0.028 | 39434.392 | 333047.272 |
| 5.5 | Conbercept | 388083.887 | - | 7.528 | - | 51554.697 | - |
| Ranibizumab | 295725.599 | -92358.288 | 7.499 | -0.028 | 39434.392 | 3248089.427 |
| 7.75 | Conbercept | 470972.093 | - | 7.528 | - | 62565.915 | - |
| Ranibizumab | 295725.599 | -175246.494 | 7.499 | -0.028 | 39434.392 | 6163131.581 |
| 10 | Conbercept | 553860.298 | - | 7.528 | - | 73577.133 | - |
| Ranibizumab | 295725.599 | -258134.699 | 7.499 | -0.028 | 39434.392 | 9078173.735 |

**Table S14.** The one-way sensitivity analysis with different numbers of ranibizumab injections from the Perspective of the Whole Society in 2022.

|  | Number of ranibizumab injections | Strategy | Cost (RMB) | Incremental costs | Effectiveness (QALYs) | Incremental effectiveness | CER | ICER |
| --- | --- | --- | --- | --- | --- | --- | --- | --- |
| AMD | 1 | Conbercept | 286884.239 | - | 7.824 | - | 36665.463 | - |
| Ranibizumab | 211327.378 | -75556.861 | 8.490 | 0.665 | 24892.609 | -113586.737 |
| 3 | Conbercept | 286884.239 | - | 7.824 | - | 36665.463 | - |
| Ranibizumab | 295927.837 | 9043.598 | 8.490 | 0.665 | 34857.840 | 13595.493 |
| 5 | Conbercept | 286884.239 | - | 7.824 | - | 36665.463 | - |
| Ranibizumab | 380528.296 | 93644.057 | 8.490 | 0.665 | 44823.071 | 140777.724 |
| 7 | Conbercept | 286884.239 | - | 7.824 | - | 36665.463 | - |
| Ranibizumab | 465128.754 | 178244.515 | 8.490 | 0.665 | 54788.302 | 267959.954 |
| 9 | Conbercept | 286884.239 | - | 7.824 | - | 36665.463 | - |
| Ranibizumab | 549729.213 | 262844.974 | 8.490 | 0.665 | 64753.533 | 395142.185 |
| BRVO | 1 | Conbercept | 263519.268 | - | 8.346 | - | 24704.344 | - |
| Ranibizumab | 204970.343 | -58548.924 | 8.297 | -0.049 | 31574.807 | 1196441.552 |
| 2.75 | Conbercept | 263519.268 | - | 8.346 | - | 31574.807 | - |
| Ranibizumab | 278995.745 | 15476.477 | 8.297 | -0.049 | 33626.362 | -316260.296 |
| 4.5 | Conbercept | 263519.268 | - | 8.346 | - | 31574.807 | - |
| Ranibizumab | 353021.146 | 89501.878 | 8.297 | -0.049 | 42548.379 | -1828962.143 |
| 6.25 | Conbercept | 263519.268 | - | 8.346 | - | 31574.807 | - |
| Ranibizumab | 427046.547 | 163527.280 | 8.297 | -0.049 | 51470.397 | -3341663.990 |
| 8 | Conbercept | 263519.268 | - | 8.346 | - | 31574.807 | - |
| Ranibizumab | 501071.948 | 237552.681 | 8.297 | -0.049 | 60392.414 | -4854365.837 |
| CRVO | 1 | Conbercept | 255608.581 | - | 8.156 | - | 31340.971 | - |
| Ranibizumab | 300839.161 | 45230.580 | 8.135 | -0.021 | 36980.862 | -2181175.290 |
| 2.75 | Conbercept | 255608.581 | - | 8.156 | - | 31340.971 | - |
| Ranibizumab | 374864.562 | 119255.981 | 8.135 | -0.021 | 46080.486 | -5750936.654 |
| 4.5 | Conbercept | 255608.581 | - | 8.156 | - | 31340.971 | - |
| Ranibizumab | 448889.963 | 193281.382 | 8.135 | -0.021 | 55180.110 | -9320698.017 |
| 6.25 | Conbercept | 255608.581 | - | 8.156 | - | 31340.971 | - |
| Ranibizumab | 522915.365 | 267306.784 | 8.135 | -0.021 | 64279.734 | -12890459.381 |
| 8 | Conbercept | 255608.581 | - | 8.156 | - | 31340.971 | - |
| Ranibizumab | 596940.766 | 341332.185 | 8.135 | -0.021 | 73379.357 | -16460220.745 |
| DME | 1 | Conbercept | 302007.905 | - | 6.973 | - | 43309.425 | - |
| Ranibizumab | 228427.923 | -73579.983 | 6.758 | -0.215 | 33800.670 | 341959.199 |
| 3.75 | Conbercept | 302007.905 | - | 6.973 | - | 43309.425 | - |
| Ranibizumab | 344753.553 | 42745.648 | 6.758 | -0.215 | 51013.470 | -198658.209 |
| 6.5 | Conbercept | 302007.905 | - | 6.973 | - | 43309.425 | - |
| Ranibizumab | 461079.184 | 159071.279 | 6.758 | -0.215 | 68226.270 | -739275.617 |
| 9.25 | Conbercept | 302007.905 | - | 6.973 | - | 43309.425 | - |
| Ranibizumab | 577404.814 | 275396.909 | 6.758 | -0.215 | 85439.071 | -1279893.025 |
| 12 | Conbercept | 302007.905 | - | 6.973 | - | 43309.425 | - |
| Ranibizumab | 693730.445 | 391722.540 | 6.758 | -0.215 | 102651.871 | -1820510.433 |
| PM | 1 | Conbercept | 277934.672 | - | 7.528 | - | 36922.011 | - |
| Ranibizumab | 231429.250 | -46505.422 | 7.499 | -0.028 | 30860.608 | 1635519.358 |
| 2.25 | Conbercept | 277934.672 | - | 7.528 | - | 36922.011 | - |
| Ranibizumab | 284304.537 | 6369.865 | 7.499 | -0.028 | 37911.417 | -224017.699 |
| 3.5 | Conbercept | 277934.672 | - | 7.528 | - | 36922.011 | - |
| Ranibizumab | 337179.824 | 59245.152 | 7.499 | -0.028 | 44962.226 | -2083554.755 |
| 4.75 | Conbercept | 277934.672 | - | 7.528 | - | 36922.011 | - |
| Ranibizumab | 390055.110 | 112120.438 | 7.499 | -0.028 | 52013.035 | -3943091.812 |
| 6 | Conbercept | 277934.672 | - | 7.528 | - | 36922.011 | - |
| Ranibizumab | 442930.397 | 164995.725 | 7.499 | -0.028 | 59063.844 | -5802628.869 |

**Table S15.** The one-way sensitivity analysis with different numbers of conbercept injections from the Perspective of the Whole Society in 2023.

|  | Number of conbercept injections | Strategy | Cost (RMB) | Incremental costs | Effectiveness (QALYs) | Incremental effectiveness | CER | ICER |
| --- | --- | --- | --- | --- | --- | --- | --- | --- |
| AMD | 1 | Conbercept | 216183.015 | - | 7.824 | - | 27629.438 | - |
| Ranibizumab | 293079.345 | 76896.330 | 8.490 | 0.665 | 34522.311 | 115600.399 |
| 3 | Conbercept | 289043.235 | - | 7.824 | - | 36941.395 | - |
| Ranibizumab | 293079.345 | 4036.111 | 8.490 | 0.665 | 34522.311 | 6067.598 |
| 5 | Conbercept | 361903.454 | - | 7.824 | - | 46253.352 | - |
| Ranibizumab | 293079.345 | -68824.109 | 8.490 | 0.665 | 34522.311 | -103465.204 |
| 7 | Conbercept | 434763.674 | - | 7.824 | - | 55565.309 | - |
| Ranibizumab | 293079.345 | -141684.328 | 8.490 | 0.665 | 34522.311 | -212998.005 |
| 9 | Conbercept | 507623.893 | - | 7.824 | - | 64877.266 | - |
| Ranibizumab | 293079.345 | -214544.548 | 8.490 | 0.665 | 34522.311 | -322530.806 |
| BRVO | 1 | Conbercept | 191171.976 | - | 8.346 | - | 22906.174 | - |
| Ranibizumab | 275311.371 | 84139.395 | 8.297 | -0.049 | 33182.297 | -1719380.316 |
| 2 | Conbercept | 228147.731 | - | 8.346 | - | 27336.599 | - |
| Ranibizumab | 275311.371 | 47163.640 | 8.297 | -0.049 | 33182.297 | -963784.375 |
| 3 | Conbercept | 265123.486 | - | 8.346 | - | 31767.024 | - |
| Ranibizumab | 275311.371 | 10187.885 | 8.297 | -0.049 | 33182.297 | -208188.435 |
| 4 | Conbercept | 302099.241 | - | 8.346 | - | 33182.297 | - |
| Ranibizumab | 275311.371 | -26787.870 | 8.297 | -0.049 | 36197.449 | 547407.505 |
| 5 | Conbercept | 339074.996 | - | 8.346 | - | 33182.297 | - |
| Ranibizumab | 275311.371 | -63763.625 | 8.297 | -0.049 | 40627.873 | 1303003.446 |
| CRVO | 1 | Conbercept | 231690.946 | - | 8.156 | - | 28408.355 | - |
| Ranibizumab | 338646.558 | 106955.612 | 8.135 | -0.021 | 41628.363 | -5157770.216 |
| 2.25 | Conbercept | 277910.640 | - | 8.156 | - | 34075.497 | - |
| Ranibizumab | 338646.558 | 60735.918 | 8.135 | -0.021 | 41628.363 | -2928896.430 |
| 3.5 | Conbercept | 324130.333 | - | 8.156 | - | 39742.639 | - |
| Ranibizumab | 338646.558 | 14516.224 | 8.135 | -0.021 | 41628.363 | -700022.643 |
| 4.75 | Conbercept | 370350.027 | - | 8.156 | - | 41628.363 | - |
| Ranibizumab | 338646.558 | -31703.469 | 8.135 | -0.021 | 45409.780 | 1528851.143 |
| 6 | Conbercept | 416569.721 | - | 8.156 | - | 41628.363 | - |
| Ranibizumab | 338646.558 | -77923.163 | 8.135 | -0.021 | 51076.922 | 3757724.929 |
| DME | 1 | Conbercept | 228642.789 | - | 6.973 | - | 32788.505 | - |
| Ranibizumab | 316215.671 | 87572.882 | 6.758 | -0.215 | 46790.696 | -406990.484 |
| 3.75 | Conbercept | 329042.665 | - | 6.973 | - | 47186.343 | - |
| Ranibizumab | 316215.671 | -12826.993 | 6.758 | -0.215 | 46790.696 | 59612.794 |
| 6.5 | Conbercept | 429442.540 | - | 6.973 | - | 61584.182 | - |
| Ranibizumab | 316215.671 | -113226.869 | 6.758 | -0.215 | 46790.696 | 526216.073 |
| 9.25 | Conbercept | 529842.416 | - | 6.973 | - | 75982.020 | - |
| Ranibizumab | 316215.671 | -213626.745 | 6.758 | -0.215 | 46790.696 | 992819.351 |
| 12 | Conbercept | 630242.292 | - | 6.973 | - | 90379.858 | - |
| Ranibizumab | 316215.671 | -314026.621 | 6.758 | -0.215 | 46790.696 | 1459422.630 |
| PM | 1 | Conbercept | 228810.693 | - | 7.528 | - | 30396.175 | - |
| Ranibizumab | 291325.802 | 62515.109 | 7.499 | -0.028 | 38847.688 | -2198553.797 |
| 3.25 | Conbercept | 311698.899 | - | 7.528 | - | 41407.393 | - |
| Ranibizumab | 291325.802 | -20373.096 | 7.499 | -0.028 | 38847.688 | 716488.357 |
| 5.5 | Conbercept | 394587.104 | - | 7.528 | - | 52418.611 | - |
| Ranibizumab | 291325.802 | -103261.302 | 7.499 | -0.028 | 38847.688 | 3631530.511 |
| 7.75 | Conbercept | 477475.309 | - | 7.528 | - | 63429.829 | - |
| Ranibizumab | 291325.802 | -186149.507 | 7.499 | -0.028 | 38847.688 | 6546572.666 |
| 10 | Conbercept | 560363.515 | - | 7.528 | - | 74441.047 | - |
| Ranibizumab | 291325.802 | -269037.712 | 7.499 | -0.028 | 38847.688 | 9461614.820 |

**Table S16.** The one-way sensitivity analysis with different numbers of ranibizumab injections from the Perspective of the Whole Society in 2023.

|  | Number of ranibizumab injections | Strategy | Cost (RMB) | Incremental costs | Effectiveness (QALYs) | Incremental effectiveness | CER | ICER |
| --- | --- | --- | --- | --- | --- | --- | --- | --- |
| AMD | 1 | Conbercept | 295600.655 | - | 7.824 | - | 37779.472 | - |
| Ranibizumab | 216938.933 | -78661.722 | 8.490 | 0.665 | 25553.603 | -118254.362 |
| 3 | Conbercept | 295600.655 | - | 7.824 | - | 37779.472 | - |
| Ranibizumab | 301539.391 | 5938.737 | 8.490 | 0.665 | 35518.834 | 8927.869 |
| 5 | Conbercept | 295600.655 | - | 7.824 | - | 37779.472 | - |
| Ranibizumab | 386139.850 | 90539.195 | 8.490 | 0.665 | 45484.065 | 136110.099 |
| 7 | Conbercept | 295600.655 | - | 7.824 | - | 37779.472 | - |
| Ranibizumab | 470740.309 | 175139.654 | 8.490 | 0.665 | 55449.296 | 263292.330 |
| 9 | Conbercept | 295600.655 | - | 7.824 | - | 37779.472 | - |
| Ranibizumab | 555340.767 | 259740.113 | 8.490 | 0.665 | 65414.527 | 390474.560 |
| BRVO | 1 | Conbercept | 253661.002 | - | 8.346 | - | 24311.263 | - |
| Ranibizumab | 201708.972 | -51952.030 | 8.297 | -0.049 | 30393.592 | 1061634.660 |
| 2.75 | Conbercept | 253661.002 | - | 8.346 | - | 30393.592 | - |
| Ranibizumab | 275734.373 | 22073.371 | 8.297 | -0.049 | 33233.280 | -451067.187 |
| 4.5 | Conbercept | 253661.002 | - | 8.346 | - | 30393.592 | - |
| Ranibizumab | 349759.774 | 96098.773 | 8.297 | -0.049 | 42155.298 | -1963769.034 |
| 6.25 | Conbercept | 253661.002 | - | 8.346 | - | 30393.592 | - |
| Ranibizumab | 423785.176 | 170124.174 | 8.297 | -0.049 | 51077.315 | -3476470.881 |
| 8 | Conbercept | 253661.002 | - | 8.346 | - | 30393.592 | - |
| Ranibizumab | 497810.577 | 244149.575 | 8.297 | -0.049 | 59999.333 | -4989172.728 |
| CRVO | 1 | Conbercept | 288263.851 | - | 8.156 | - | 31176.795 | - |
| Ranibizumab | 253623.097 | -106955.612 | 8.135 | -0.021 | 35344.936 | 1670497.208 |
| 2.75 | Conbercept | 288263.851 | - | 8.156 | - | 35344.936 | - |
| Ranibizumab | 327648.498 | 60735.918 | 8.135 | -0.021 | 40276.419 | -1899264.156 |
| 4.5 | Conbercept | 288263.851 | - | 8.156 | - | 35344.936 | - |
| Ranibizumab | 401673.900 | 14516.224 | 8.135 | -0.021 | 49376.042 | -5469025.520 |
| 6.25 | Conbercept | 288263.851 | - | 8.156 | - | 35344.936 | - |
| Ranibizumab | 475699.301 | 31703.469 | 8.135 | -0.021 | 58475.666 | -9038786.884 |
| 8 | Conbercept | 288263.851 | - | 8.156 | - | 35344.936 | - |
| Ranibizumab | 549724.702 | 77923.163 | 8.156 | 0.021 | 67575.290 | -12608548.248 |
| DME | 1 | Conbercept | 301295.790 | - | 6.973 | - | 43207.305 | - |
| Ranibizumab | 233307.222 | -67988.568 | 6.758 | -0.215 | 34522.664 | 315973.386 |
| 3.75 | Conbercept | 301295.790 | - | 6.973 | - | 43207.305 | - |
| Ranibizumab | 349632.852 | 48337.063 | 6.758 | -0.215 | 51735.464 | -224644.022 |
| 6.5 | Conbercept | 301295.790 | - | 6.973 | - | 43207.305 | - |
| Ranibizumab | 465958.483 | 164662.693 | 6.758 | -0.215 | 68948.264 | -765261.430 |
| 9.25 | Conbercept | 301295.790 | - | 6.973 | - | 43207.305 | - |
| Ranibizumab | 582284.114 | 280988.324 | 6.758 | -0.215 | 86161.065 | -1305878.838 |
| 12 | Conbercept | 301295.790 | - | 6.973 | - | 43207.305 | - |
| Ranibizumab | 698609.744 | 397313.954 | 6.758 | -0.215 | 103373.865 | -1846496.246 |
| PM | 1 | Conbercept | 279648.792 | - | 7.528 | - | 37149.722 | - |
| Ranibizumab | 233374.488 | -46274.304 | 7.499 | -0.028 | 31120.001 | 1627391.339 |
| 2.25 | Conbercept | 279648.792 | - | 7.528 | - | 37149.722 | - |
| Ranibizumab | 286249.775 | 6600.982 | 7.499 | -0.028 | 38170.810 | -232145.718 |
| 3.5 | Conbercept | 279648.792 | - | 7.528 | - | 37149.722 | - |
| Ranibizumab | 339125.062 | 59476.269 | 7.499 | -0.028 | 45221.619 | -2091682.775 |
| 4.75 | Conbercept | 279648.792 | - | 7.528 | - | 37149.722 | - |
| Ranibizumab | 392000.348 | 112351.556 | 7.499 | -0.028 | 52272.428 | -3951219.832 |
| 6 | Conbercept | 279648.792 | - | 7.528 | - | 37149.722 | - |
| Ranibizumab | 444875.635 | 165226.842 | 7.499 | -0.028 | 59323.238 | -5810756.889 |

**Table S17.** The one-way sensitivity analysis with different numbers of conbercept injections from the Perspective of the Whole Society in 2024.

|  | Number of conbercept injections | Strategy | Cost (RMB) | Incremental costs | Effectiveness (QALYs) | Incremental effectiveness | CER | ICER |
| --- | --- | --- | --- | --- | --- | --- | --- | --- |
| AMD | 1 | Conbercept | 204073.929 | - | 7.824 | - | 26081.827 | - |
| Ranibizumab | 279338.454 | 75264.525 | 8.490 | 0.665 | 32903.748 | 113147.261 |
| 3 | Conbercept | 276934.149 | - | 7.824 | - | 35393.784 | - |
| Ranibizumab | 279338.454 | 2404.306 | 8.490 | 0.665 | 32903.748 | 3614.460 |
| 5 | Conbercept | 349794.368 | - | 7.824 | - | 44705.741 | - |
| Ranibizumab | 279338.454 | -70455.914 | 8.490 | 0.665 | 32903.748 | -105918.341 |
| 7 | Conbercept | 422654.587 | - | 7.824 | - | 54017.698 | - |
| Ranibizumab | 279338.454 | -143316.133 | 8.490 | 0.665 | 32903.748 | -215451.142 |
| 9 | Conbercept | 495514.807 | - | 7.824 | - | 63329.655 | - |
| Ranibizumab | 279338.454 | -216176.352 | 8.490 | 0.665 | 32903.748 | -324983.944 |
| BRVO | 1 | Conbercept | 198367.644 | - | 8.346 | - | 23768.357 | - |
| Ranibizumab | 249251.083 | 50883.438 | 8.297 | -0.049 | 30041.344 | -1039798.092 |
| 2 | Conbercept | 235343.399 | - | 8.346 | - | 28198.782 | - |
| Ranibizumab | 249251.083 | 13907.683 | 8.297 | -0.049 | 30041.344 | -284202.151 |
| 3 | Conbercept | 272319.154 | - | 8.346 | - | 30041.344 | - |
| Ranibizumab | 249251.083 | -23068.072 | 8.297 | -0.049 | 32629.207 | 471393.789 |
| 4 | Conbercept | 309294.909 | - | 8.346 | - | 30041.344 | - |
| Ranibizumab | 249251.083 | -60043.826 | 8.297 | -0.049 | 37059.632 | 1226989.729 |
| 5 | Conbercept | 346270.664 | - | 8.346 | - | 30041.344 | - |
| Ranibizumab | 249251.083 | -97019.581 | 8.297 | -0.049 | 41490.056 | 1982585.670 |
| CRVO | 1 | Conbercept | 246558.713 | - | 8.156 | - | 30231.338 | - |
| Ranibizumab | 345638.671 | 99079.958 | 8.135 | -0.021 | 42487.873 | -4777978.903 |
| 2.25 | Conbercept | 292778.407 | - | 8.156 | - | 35898.480 | - |
| Ranibizumab | 345638.671 | 52860.264 | 8.135 | -0.021 | 42487.873 | -2549105.117 |
| 3.5 | Conbercept | 338998.101 | - | 8.156 | - | 41565.622 | - |
| Ranibizumab | 345638.671 | 6640.571 | 8.135 | -0.021 | 42487.873 | -320231.331 |
| 4.75 | Conbercept | 385217.794 | - | 8.156 | - | 42487.873 | - |
| Ranibizumab | 345638.671 | -39579.123 | 8.135 | -0.021 | 47232.764 | 1908642.455 |
| 6 | Conbercept | 431437.488 | - | 8.156 | - | 42487.873 | - |
| Ranibizumab | 345638.671 | -85798.816 | 8.135 | -0.021 | 52899.906 | 4137516.241 |
| DME | 1 | Conbercept | 230906.023 | - | 6.973 | - | 33113.064 | - |
| Ranibizumab | 307345.669 | 76439.646 | 6.758 | -0.215 | 45478.194 | -355249.338 |
| 3.75 | Conbercept | 331305.899 | - | 6.973 | - | 47510.903 | - |
| Ranibizumab | 307345.669 | -23960.230 | 6.758 | -0.215 | 45478.194 | 111353.941 |
| 6.5 | Conbercept | 431705.775 | - | 6.973 | - | 61908.741 | - |
| Ranibizumab | 307345.669 | -124360.106 | 6.758 | -0.215 | 45478.194 | 577957.219 |
| 9.25 | Conbercept | 532105.651 | - | 6.973 | - | 76306.579 | - |
| Ranibizumab | 307345.669 | -224759.981 | 6.758 | -0.215 | 45478.194 | 1044560.498 |
| 12 | Conbercept | 632505.526 | - | 6.973 | - | 90704.417 | - |
| Ranibizumab | 307345.669 | -325159.857 | 6.758 | -0.215 | 45478.194 | 1511163.776 |
| PM | 1 | Conbercept | 232649.739 | - | 7.528 | - | 30906.170 | - |
| Ranibizumab | 296886.187 | 64236.448 | 7.499 | -0.028 | 39589.154 | -2259090.459 |
| 3.25 | Conbercept | 315537.944 | - | 7.528 | - | 41917.388 | - |
| Ranibizumab | 296886.187 | -18651.757 | 7.499 | -0.028 | 39589.154 | 655951.695 |
| 5.5 | Conbercept | 398426.150 | - | 7.528 | - | 52928.606 | - |
| Ranibizumab | 296886.187 | -101539.963 | 7.499 | -0.028 | 39589.154 | 3570993.849 |
| 7.75 | Conbercept | 481314.355 | - | 7.528 | - | 63939.824 | - |
| Ranibizumab | 296886.187 | -184428.168 | 7.499 | -0.028 | 39589.154 | 6486036.004 |
| 10 | Conbercept | 564202.560 | - | 7.528 | - | 74951.042 | - |
| Ranibizumab | 296886.187 | -267316.373 | 7.499 | -0.028 | 39589.154 | 9401078.158 |

**Table S18.** The one-way sensitivity analysis with different numbers of ranibizumab injections from the Perspective of the Whole Society in 2024.

|  | Number of ranibizumab injections | Strategy | Cost (RMB) | Incremental costs | Effectiveness (QALYs) | Incremental effectiveness | CER | ICER |
| --- | --- | --- | --- | --- | --- | --- | --- | --- |
| AMD | 1 | Conbercept | 249247.265 | - | 7.824 | - | 31855.241 | - |
| Ranibizumab | 215215.537 | -34031.728 | 8.490 | 0.665 | 25350.602 | -51160.847 |
| 3 | Conbercept | 249247.265 | - | 7.824 | - | 31855.241 | - |
| Ranibizumab | 293893.963 | 44646.698 | 8.490 | 0.665 | 34618.266 | 67118.627 |
| 5 | Conbercept | 249247.265 | - | 7.824 | - | 31855.241 | - |
| Ranibizumab | 372572.390 | 123325.125 | 8.490 | 0.665 | 43885.931 | 185398.102 |
| 7 | Conbercept | 249247.265 | - | 7.824 | - | 31855.241 | - |
| Ranibizumab | 451250.816 | 202003.551 | 8.490 | 0.665 | 53153.596 | 303677.576 |
| 9 | Conbercept | 249247.265 | - | 7.824 | - | 31855.241 | - |
| Ranibizumab | 529929.243 | 280681.978 | 8.490 | 0.665 | 62421.261 | 421957.050 |
| BRVO | 1 | Conbercept | 259747.398 | - | 8.346 | - | 24114.575 | - |
| Ranibizumab | 200077.066 | -59670.331 | 8.297 | -0.049 | 31122.862 | 1219357.396 |
| 2.75 | Conbercept | 259747.398 | - | 8.346 | - | 31122.862 | - |
| Ranibizumab | 268920.689 | 9173.292 | 8.297 | -0.049 | 32412.051 | -187455.322 |
| 4.5 | Conbercept | 259747.398 | - | 8.346 | - | 31122.862 | - |
| Ranibizumab | 337764.313 | 78016.915 | 8.297 | -0.049 | 40709.527 | -1594268.039 |
| 6.25 | Conbercept | 259747.398 | - | 8.346 | - | 31122.862 | - |
| Ranibizumab | 406607.936 | 146860.538 | 8.297 | -0.049 | 49007.004 | -3001080.757 |
| 8 | Conbercept | 259747.398 | - | 8.346 | - | 31122.862 | - |
| Ranibizumab | 475451.559 | 215704.161 | 8.297 | -0.049 | 57304.480 | -4407893.475 |
| CRVO | 1 | Conbercept | 319770.708 | - | 8.156 | - | 32381.051 | - |
| Ranibizumab | 263419.716 | -56350.992 | 8.135 | -0.021 | 39208.091 | 2717440.124 |
| 2.75 | Conbercept | 319770.708 | - | 8.156 | - | 39208.091 | - |
| Ranibizumab | 332263.339 | 12492.631 | 8.135 | -0.021 | 40843.701 | -602437.944 |
| 4.5 | Conbercept | 319770.708 | - | 8.156 | - | 39208.091 | - |
| Ranibizumab | 401106.962 | 81336.254 | 8.135 | -0.021 | 49306.351 | -3922316.013 |
| 6.25 | Conbercept | 319770.708 | - | 8.156 | - | 39208.091 | - |
| Ranibizumab | 469950.585 | 150179.877 | 8.135 | -0.021 | 57769.001 | -7242194.081 |
| 8 | Conbercept | 319770.708 | - | 8.156 | - | 39208.091 | - |
| Ranibizumab | 538794.209 | 219023.500 | 8.135 | -0.021 | 66231.651 | -10562072.150 |
| DME | 1 | Conbercept | 300596.784 | - | 6.973 | - | 43107.064 | - |
| Ranibizumab | 225510.089 | -75086.695 | 6.758 | -0.215 | 33368.915 | 348961.570 |
| 3.75 | Conbercept | 300596.784 | - | 6.973 | - | 43107.064 | - |
| Ranibizumab | 333692.925 | 33096.141 | 6.758 | -0.215 | 49376.820 | -153812.620 |
| 6.5 | Conbercept | 300596.784 | - | 6.973 | - | 43107.064 | - |
| Ranibizumab | 441875.761 | 141278.978 | 6.758 | -0.215 | 65384.724 | -656586.809 |
| 9.25 | Conbercept | 300596.784 | - | 6.973 | - | 43107.064 | - |
| Ranibizumab | 550058.598 | 249461.814 | 6.758 | -0.215 | 81392.628 | -1159360.999 |
| 12 | Conbercept | 300596.784 | - | 6.973 | - | 43107.064 | - |
| Ranibizumab | 658241.434 | 357644.650 | 6.758 | -0.215 | 97400.532 | -1662135.188 |
| PM | 1 | Conbercept | 280172.310 | - | 7.528 | - | 37219.269 | - |
| Ranibizumab | 238270.759 | -41901.551 | 7.499 | -0.028 | 31772.909 | 1473608.776 |
| 2.25 | Conbercept | 280172.310 | - | 7.528 | - | 37219.269 | - |
| Ranibizumab | 287444.776 | 7272.466 | 7.499 | -0.028 | 38330.161 | -255760.687 |
| 3.5 | Conbercept | 280172.310 | - | 7.528 | - | 37219.269 | - |
| Ranibizumab | 336618.792 | 56446.482 | 7.499 | -0.028 | 44887.414 | -1985130.150 |
| 4.75 | Conbercept | 280172.310 | - | 7.528 | - | 37219.269 | - |
| Ranibizumab | 385792.809 | 105620.499 | 7.499 | -0.028 | 51444.666 | -3714499.613 |
| 6 | Conbercept | 280172.310 | - | 7.528 | - | 37219.269 | - |
| Ranibizumab | 434966.826 | 154794.516 | 7.499 | -0.028 | 58001.919 | -5443869.076 |

**Table S19.** The one-way sensitivity analysis with different numbers of conbercept injections from the Perspective of the Health Insurance Payer in 2021.

|  | Number of conbercept injections | Strategy | Cost (RMB) | Incremental costs | Effectiveness (QALYs) | Incremental effectiveness | CER | ICER |
| --- | --- | --- | --- | --- | --- | --- | --- | --- |
| AMD | 1 | Conbercept | 85650.420 | - | 7.824 | - | 10946.619 | - |
| Ranibizumab | 150067.927 | 64417.507 | 8.490 | 0.665 | 17676.755 | 96840.636 |
| 3 | Conbercept | 173433.817 | - | 7.824 | - | 22165.844 | - |
| Ranibizumab | 150067.927 | -23365.890 | 8.490 | 0.665 | 17676.755 | -35126.595 |
| 5 | Conbercept | 261217.214 | - | 7.824 | - | 33385.069 | - |
| Ranibizumab | 150067.927 | -111149.287 | 8.490 | 0.665 | 17676.755 | -167093.825 |
| 7 | Conbercept | 349000.611 | - | 7.824 | - | 44604.294 | - |
| Ranibizumab | 150067.927 | -198932.684 | 8.490 | 0.665 | 17676.755 | -299061.055 |
| 9 | Conbercept | 436784.007 | - | 7.824 | - | 55823.520 | - |
| Ranibizumab | 150067.927 | -286716.081 | 8.490 | 0.665 | 17676.755 | -431028.286 |
| BRVO | 1 | Conbercept | 71709.705 | - | 8.346 | - | 8592.237 | - |
| Ranibizumab | 199200.285 | 127490.581 | 8.297 | -0.049 | 24008.900 | -2605257.565 |
| 2 | Conbercept | 116258.807 | - | 8.346 | - | 13930.099 | - |
| Ranibizumab | 199200.285 | 82941.478 | 8.297 | -0.049 | 24008.900 | -1694901.010 |
| 3 | Conbercept | 160807.909 | - | 8.346 | - | 19267.960 | - |
| Ranibizumab | 199200.285 | 38392.376 | 8.297 | -0.049 | 24008.900 | -784544.455 |
| 4 | Conbercept | 205357.011 | - | 8.346 | - | 24605.821 | - |
| Ranibizumab | 199200.285 | -6156.726 | 8.297 | -0.049 | 24008.900 | 125812.099 |
| 5 | Conbercept | 249906.114 | - | 8.346 | - | 29943.682 | - |
| Ranibizumab | 199200.285 | -50705.828 | 8.297 | -0.049 | 24008.900 | 1036168.654 |
| CRVO | 1 | Conbercept | 75190.746 | - | 8.156 | - | 9219.374 | - |
| Ranibizumab | 177586.142 | 102395.396 | 8.135 | -0.021 | 21829.900 | -4937860.836 |
| 2.25 | Conbercept | 130877.124 | - | 8.156 | - | 16047.255 | - |
| Ranibizumab | 177586.142 | 46709.019 | 8.135 | -0.021 | 21829.900 | -2252470.733 |
| 3.5 | Conbercept | 186563.502 | - | 8.156 | - | 22875.137 | - |
| Ranibizumab | 177586.142 | -8977.359 | 8.135 | -0.021 | 21829.900 | 432919.371 |
| 4.75 | Conbercept | 242249.879 | - | 8.156 | - | 29703.019 | - |
| Ranibizumab | 177586.142 | -64663.737 | 8.135 | -0.021 | 21829.900 | 3118309.475 |
| 6 | Conbercept | 297936.257 | - | 8.156 | - | 36530.901 | - |
| Ranibizumab | 177586.142 | -120350.115 | 8.135 | -0.021 | 21829.900 | 5803699.579 |
| DME | 1 | Conbercept | 119692.182 | - | 6.973 | - | 17164.450 | - |
| Ranibizumab | 179947.300 | 60255.118 | 6.758 | -0.215 | 26626.952 | -280032.573 |
| 3.75 | Conbercept | 240655.888 | - | 6.973 | - | 34511.243 | - |
| Ranibizumab | 179947.300 | -60708.588 | 6.758 | -0.215 | 26626.952 | 282140.051 |
| 6.5 | Conbercept | 361619.593 | - | 6.973 | - | 51858.036 | - |
| Ranibizumab | 179947.300 | -181672.294 | 6.758 | -0.215 | 26626.952 | 844312.676 |
| 9.25 | Conbercept | 482583.299 | - | 6.973 | - | 69204.829 | - |
| Ranibizumab | 179947.300 | -302635.999 | 6.758 | -0.215 | 26626.952 | 1406485.301 |
| 12 | Conbercept | 603547.005 | - | 6.973 | - | 86551.622 | - |
| Ranibizumab | 179947.300 | -423599.705 | 6.758 | -0.215 | 26626.952 | 1968657.925 |
| PM | 1 | Conbercept | 93031.384 | - | 7.528 | - | 12358.681 | - |
| Ranibizumab | 138683.202 | 45651.818 | 7.499 | -0.028 | 18493.116 | -1605499.511 |
| 3.25 | Conbercept | 192896.692 | - | 7.528 | - | 25625.208 | - |
| Ranibizumab | 138683.202 | -54213.490 | 7.499 | -0.028 | 18493.116 | 1906599.470 |
| 5.5 | Conbercept | 292761.999 | - | 7.528 | - | 38891.736 | - |
| Ranibizumab | 138683.202 | -154078.798 | 7.499 | -0.028 | 18493.116 | 5418698.451 |
| 7.75 | Conbercept | 392627.307 | - | 7.528 | - | 52158.264 | - |
| Ranibizumab | 138683.202 | -253944.105 | 7.499 | -0.028 | 18493.116 | 8930797.432 |
| 10 | Conbercept | 492492.615 | - | 7.528 | - | 65424.791 | - |
| Ranibizumab | 138683.202 | -353809.413 | 7.499 | -0.028 | 18493.116 | 12444931.867 |

**Table S20**. The one-way sensitivity analysis with different numbers of ranibizumab injections from the Perspective of the Health Insurance Payer in 2021.

|  | Number of ranibizumab injections | Strategy | Cost (RMB) | Incremental costs | Effectiveness (QALYs) | Incremental effectiveness | CER | ICER |
| --- | --- | --- | --- | --- | --- | --- | --- | --- |
| AMD | 1 | Conbercept | 123397.281 | - | 7.824 | - | 15770.885 | - |
| Ranibizumab | 93808.622 | -29588.659 | 8.490 | 0.665 | 11049.876 | -44481.457 |
| 3 | Conbercept | 123397.281 | - | 7.824 | - | 15770.885 | - |
| Ranibizumab | 178409.080 | 55011.800 | 8.490 | 0.665 | 21015.107 | 82700.774 |
| 5 | Conbercept | 123397.281 | - | 7.824 | - | 15770.885 | - |
| Ranibizumab | 263009.539 | 139612.258 | 8.490 | 0.665 | 30980.338 | 209883.004 |
| 7 | Conbercept | 123397.281 | - | 7.824 | - | 15770.885 | - |
| Ranibizumab | 347609.998 | 224212.717 | 8.490 | 0.665 | 40945.569 | 337065.235 |
| 9 | Conbercept | 123397.281 | - | 7.824 | - | 15770.885 | - |
| Ranibizumab | 432210.456 | 308813.176 | 8.490 | 0.665 | 50910.800 | 464247.465 |
| BRVO | 1 | Conbercept | 71709.705 | - | 8.346 | - | 8592.237 | - |
| Ranibizumab | 115868.834 | 44159.129 | 8.297 | -0.049 | 13965.257 | -902387.485 |
| 2.75 | Conbercept | 71709.705 | - | 8.346 | - | 8592.237 | - |
| Ranibizumab | 189894.235 | 118184.530 | 8.297 | -0.049 | 22887.275 | -2415089.332 |
| 4.5 | Conbercept | 71709.705 | - | 8.346 | - | 8592.237 | - |
| Ranibizumab | 263919.636 | 192209.931 | 8.297 | -0.049 | 31809.292 | -3927791.180 |
| 6.25 | Conbercept | 71709.705 | - | 8.346 | - | 8592.237 | - |
| Ranibizumab | 337945.037 | 266235.333 | 8.297 | -0.049 | 40731.310 | -5440493.027 |
| 8 | Conbercept | 71709.705 | - | 8.346 | - | 8592.237 | - |
| Ranibizumab | 411970.439 | 340260.734 | 8.297 | -0.049 | 49653.327 | -6953194.874 |
| CRVO | 1 | Conbercept | 75190.746 | - | 8.156 | - | 9219.374 | - |
| Ranibizumab | 105252.750 | 30062.004 | 8.135 | -0.021 | 12938.267 | -1449694.018 |
| 2.75 | Conbercept | 75190.746 | - | 8.156 | - | 9219.374 | - |
| Ranibizumab | 179278.151 | 104087.406 | 8.135 | -0.021 | 22037.891 | -5019455.382 |
| 4.5 | Conbercept | 75190.746 | - | 8.156 | - | 9219.374 | - |
| Ranibizumab | 253303.553 | 178112.807 | 8.135 | -0.021 | 31137.515 | -8589216.746 |
| 6.25 | Conbercept | 75190.746 | - | 8.156 | - | 9219.374 | - |
| Ranibizumab | 327328.954 | 252138.208 | 8.135 | -0.021 | 40237.139 | -12158978.109 |
| 8 | Conbercept | 75190.746 | - | 8.156 | - | 9219.374 | - |
| Ranibizumab | 401354.355 | 326163.609 | 8.135 | -0.021 | 49336.762 | -15728739.473 |
| DME | 1 | Conbercept | 196669.085 | - | 6.973 | - | 28203.318 | - |
| Ranibizumab | 103383.885 | -93285.201 | 6.758 | -0.215 | 15297.799 | 433538.191 |
| 3.75 | Conbercept | 196669.085 | - | 6.973 | - | 28203.318 | - |
| Ranibizumab | 219709.515 | 23040.430 | 6.758 | -0.215 | 32510.600 | -107079.217 |
| 6.5 | Conbercept | 196669.085 | - | 6.973 | - | 28203.318 | - |
| Ranibizumab | 336035.146 | 139366.060 | 6.758 | -0.215 | 49723.400 | -647696.625 |
| 9.25 | Conbercept | 196669.085 | - | 6.973 | - | 28203.318 | - |
| Ranibizumab | 452360.777 | 255691.691 | 6.758 | -0.215 | 66936.200 | -1188314.033 |
| 12 | Conbercept | 196669.085 | - | 6.973 | - | 28203.318 | - |
| Ranibizumab | 568686.407 | 372017.322 | 6.758 | -0.215 | 84149.001 | -1728931.442 |
| PM | 1 | Conbercept | 153394.414 | - | 7.528 | - | 20377.559 | - |
| Ranibizumab | 89191.934 | -64202.481 | 7.499 | -0.028 | 11893.558 | 2257895.892 |
| 2.25 | Conbercept | 153394.414 | - | 7.528 | - | 20377.559 | - |
| Ranibizumab | 142067.220 | -11327.194 | 7.499 | -0.028 | 18944.367 | 398358.835 |
| 3.5 | Conbercept | 153394.414 | - | 7.528 | - | 20377.559 | - |
| Ranibizumab | 194942.507 | 41548.092 | 7.499 | -0.028 | 25995.177 | -1461178.222 |
| 4.75 | Conbercept | 153394.414 | - | 7.528 | - | 20377.559 | - |
| Ranibizumab | 247817.793 | 94423.379 | 7.499 | -0.028 | 33045.986 | -3320715.279 |
| 6 | Conbercept | 153394.414 | - | 7.528 | - | 20377.559 | - |
| Ranibizumab | 300693.080 | 147298.666 | 7.499 | -0.028 | 40096.795 | -5180252.336 |

**Table S21.** The one-way sensitivity analysis with different numbers of conbercept injections from the Perspective of the Health Insurance Payer in 2022.

|  | Number of conbercept injections | Strategy | Cost (RMB) | Incremental costs | Effectiveness (QALYs) | Incremental effectiveness | CER | ICER |
| --- | --- | --- | --- | --- | --- | --- | --- | --- |
| AMD | 1 | Conbercept | 96972.324 | - | 7.824 | - | 12393.623 | - |
| Ranibizumab | 180625.826 | 83653.502 | 8.490 | 0.665 | 21276.221 | 125758.644 |
| 3 | Conbercept | 169832.544 | - | 7.824 | - | 21705.580 | - |
| Ranibizumab | 180625.826 | 10793.283 | 8.490 | 0.665 | 21276.221 | 16225.843 |
| 5 | Conbercept | 242692.763 | - | 7.824 | - | 31017.537 | - |
| Ranibizumab | 180625.826 | -62066.937 | 8.490 | 0.665 | 21276.221 | -93306.958 |
| 7 | Conbercept | 315552.983 | - | 7.824 | - | 40329.494 | - |
| Ranibizumab | 180625.826 | -134927.156 | 8.490 | 0.665 | 21276.221 | -202839.760 |
| 9 | Conbercept | 388413.202 | - | 7.824 | - | 49641.451 | - |
| Ranibizumab | 180625.826 | -207787.376 | 8.490 | 0.665 | 21276.221 | -312372.561 |
| BRVO | 1 | Conbercept | 87971.305 | - | 8.346 | - | 10540.698 | - |
| Ranibizumab | 190696.554 | 102725.249 | 8.297 | -0.049 | 22983.975 | -2099180.441 |
| 2 | Conbercept | 124947.060 | - | 8.346 | - | 14971.123 | - |
| Ranibizumab | 190696.554 | 65749.495 | 8.297 | -0.049 | 22983.975 | -1343584.501 |
| 3 | Conbercept | 161922.815 | - | 8.346 | - | 19401.547 | - |
| Ranibizumab | 190696.554 | 28773.740 | 8.297 | -0.049 | 22983.975 | -587988.560 |
| 4 | Conbercept | 198898.570 | - | 8.346 | - | 22983.975 | - |
| Ranibizumab | 190696.554 | -8202.015 | 8.297 | -0.049 | 23831.972 | 167607.380 |
| 5 | Conbercept | 235874.325 | - | 8.346 | - | 22983.975 | - |
| Ranibizumab | 190696.554 | -45177.770 | 8.297 | -0.049 | 28262.397 | 923203.320 |
| CRVO | 1 | Conbercept | 57015.944 | - | 8.156 | - | 6990.904 | - |
| Ranibizumab | 270192.166 | 213176.222 | 8.135 | -0.021 | 33213.559 | -10280096.117 |
| 2.25 | Conbercept | 103235.637 | - | 8.156 | - | 12658.046 | - |
| Ranibizumab | 270192.166 | 166956.528 | 8.135 | -0.021 | 33213.559 | -8051222.331 |
| 3.5 | Conbercept | 149455.331 | - | 8.156 | - | 18325.188 | - |
| Ranibizumab | 270192.166 | 120736.835 | 8.135 | -0.021 | 33213.559 | -5822348.545 |
| 4.75 | Conbercept | 195675.024 | - | 8.156 | - | 23992.330 | - |
| Ranibizumab | 270192.166 | 74517.141 | 8.135 | -0.021 | 33213.559 | -3593474.759 |
| 6 | Conbercept | 241894.718 | - | 8.156 | - | 29659.471 | - |
| Ranibizumab | 270192.166 | 28297.447 | 8.135 | -0.021 | 33213.559 | -1364600.973 |
| DME | 1 | Conbercept | 104993.079 | - | 6.973 | - | 15056.526 | - |
| Ranibizumab | 191964.675 | 86971.597 | 6.758 | -0.215 | 28405.173 | -404196.039 |
| 3.75 | Conbercept | 205392.954 | - | 6.973 | - | 29454.364 | - |
| Ranibizumab | 191964.675 | -13428.279 | 6.758 | -0.215 | 28405.173 | 62407.240 |
| 6.5 | Conbercept | 305792.830 | - | 6.973 | - | 43852.202 | - |
| Ranibizumab | 191964.675 | -113828.155 | 6.758 | -0.215 | 28405.173 | 529010.518 |
| 9.25 | Conbercept | 406192.706 | - | 6.973 | - | 58250.041 | - |
| Ranibizumab | 191964.675 | -214228.031 | 6.758 | -0.215 | 28405.173 | 995613.797 |
| 12 | Conbercept | 506592.582 | - | 6.973 | - | 72647.879 | - |
| Ranibizumab | 191964.675 | -314627.907 | 6.758 | -0.215 | 28405.173 | 1462217.075 |
| PM | 1 | Conbercept | 87311.396 | - | 7.528 | - | 11598.813 | - |
| Ranibizumab | 159907.483 | 72596.088 | 7.499 | -0.028 | 21323.329 | -2553085.259 |
| 3.25 | Conbercept | 170199.601 | - | 7.528 | - | 22610.031 | - |
| Ranibizumab | 159907.483 | -10292.118 | 7.499 | -0.028 | 21323.329 | 361956.895 |
| 5.5 | Conbercept | 253087.807 | - | 7.528 | - | 33621.249 | - |
| Ranibizumab | 159907.483 | -93180.323 | 7.499 | -0.028 | 21323.329 | 3276999.050 |
| 7.75 | Conbercept | 335976.012 | - | 7.528 | - | 44632.467 | - |
| Ranibizumab | 159907.483 | -176068.529 | 7.499 | -0.028 | 21323.329 | 6192041.204 |
| 10 | Conbercept | 418864.217 | - | 7.528 | - | 55643.685 | - |
| Ranibizumab | 159907.483 | -258956.734 | 7.499 | -0.028 | 21323.329 | 9107083.358 |

**Table S22.** The one-way sensitivity analysis with different numbers of ranibizumab injections from the Perspective of the Health Insurance Payer in 2022.

|  | Number of ranibizumab injections | Strategy | Cost (RMB) | Incremental costs | Effectiveness (QALYs) | Incremental effectiveness | CER | ICER |
| --- | --- | --- | --- | --- | --- | --- | --- | --- |
| AMD | 1 | Conbercept | 177482.867 | - | 7.824 | - | 22683.336 | - |
| Ranibizumab | 101101.395 | -76381.472 | 8.490 | 0.665 | 11908.904 | -114826.398 |
| 3 | Conbercept | 177482.867 | - | 7.824 | - | 22683.336 | - |
| Ranibizumab | 185701.854 | 8218.987 | 8.490 | 0.665 | 21874.135 | 12355.833 |
| 5 | Conbercept | 177482.867 | - | 7.824 | - | 22683.336 | - |
| Ranibizumab | 270302.313 | 92819.446 | 8.490 | 0.665 | 31839.366 | 139538.063 |
| 7 | Conbercept | 177482.867 | - | 7.824 | - | 22683.336 | - |
| Ranibizumab | 354902.771 | 177419.904 | 8.490 | 0.665 | 41804.597 | 266720.294 |
| 9 | Conbercept | 177482.867 | - | 7.824 | - | 22683.336 | - |
| Ranibizumab | 439503.230 | 262020.363 | 8.490 | 0.665 | 51769.828 | 393902.524 |
| BRVO | 1 | Conbercept | 150090.573 | - | 8.346 | - | 13093.282 | - |
| Ranibizumab | 108634.110 | -41456.464 | 8.297 | -0.049 | 17983.812 | 847158.786 |
| 2.75 | Conbercept | 150090.573 | - | 8.346 | - | 17983.812 | - |
| Ranibizumab | 182659.511 | 32568.938 | 8.297 | -0.049 | 22015.299 | -665543.061 |
| 4.5 | Conbercept | 150090.573 | - | 8.346 | - | 17983.812 | - |
| Ranibizumab | 256684.912 | 106594.339 | 8.297 | -0.049 | 30937.317 | -2178244.908 |
| 6.25 | Conbercept | 150090.573 | - | 8.346 | - | 17983.812 | - |
| Ranibizumab | 330710.313 | 180619.740 | 8.297 | -0.049 | 39859.334 | -3690946.755 |
| 8 | Conbercept | 150090.573 | - | 8.346 | - | 17983.812 | - |
| Ranibizumab | 404735.715 | 254645.142 | 8.297 | -0.049 | 48781.352 | -5203648.602 |
| CRVO | 1 | Conbercept | 93991.699 | - | 8.156 | - | 11524.617 | - |
| Ranibizumab | 168248.613 | 74256.914 | 8.135 | -0.021 | 20682.077 | -3580925.724 |
| 2.75 | Conbercept | 93991.699 | - | 8.156 | - | 11524.617 | - |
| Ranibizumab | 242274.014 | 148282.316 | 8.135 | -0.021 | 29781.701 | -7150687.088 |
| 4.5 | Conbercept | 93991.699 | - | 8.156 | - | 11524.617 | - |
| Ranibizumab | 316299.415 | 222307.717 | 8.135 | -0.021 | 38881.325 | -10720448.452 |
| 6.25 | Conbercept | 93991.699 | - | 8.156 | - | 11524.617 | - |
| Ranibizumab | 390324.817 | 296333.118 | 8.135 | -0.021 | 47980.949 | -14290209.816 |
| 8 | Conbercept | 93991.699 | - | 8.156 | - | 11524.617 | - |
| Ranibizumab | 464350.218 | 370358.520 | 8.135 | -0.021 | 57080.572 | -17859971.180 |
| DME | 1 | Conbercept | 173995.175 | - | 6.973 | - | 24951.768 | - |
| Ranibizumab | 105249.205 | -68745.970 | 6.758 | -0.215 | 15573.812 | 319493.373 |
| 3.75 | Conbercept | 173995.175 | - | 6.973 | - | 24951.768 | - |
| Ranibizumab | 221574.836 | 47579.661 | 6.758 | -0.215 | 32786.613 | -221124.035 |
| 6.5 | Conbercept | 173995.175 | - | 6.973 | - | 24951.768 | - |
| Ranibizumab | 337900.466 | 163905.291 | 6.758 | -0.215 | 49999.413 | -761741.443 |
| 9.25 | Conbercept | 173995.175 | - | 6.973 | - | 24951.768 | - |
| Ranibizumab | 454226.097 | 280230.922 | 6.758 | -0.215 | 67212.213 | -1302358.851 |
| 12 | Conbercept | 173995.175 | - | 6.973 | - | 24951.768 | - |
| Ranibizumab | 570551.728 | 396556.552 | 6.758 | -0.215 | 84425.014 | -1842976.259 |
| PM | 1 | Conbercept | 142938.592 | - | 7.528 | - | 18988.564 | - |
| Ranibizumab | 95611.135 | -47327.457 | 7.499 | -0.028 | 12749.545 | 1664428.981 |
| 2.25 | Conbercept | 142938.592 | - | 7.528 | - | 18988.564 | - |
| Ranibizumab | 148486.422 | 5547.830 | 7.499 | -0.028 | 19800.354 | -195108.076 |
| 3.5 | Conbercept | 142938.592 | - | 7.528 | - | 18988.564 | - |
| Ranibizumab | 201361.708 | 58423.117 | 7.499 | -0.028 | 26851.164 | -2054645.132 |
| 4.75 | Conbercept | 142938.592 | - | 7.528 | - | 18988.564 | - |
| Ranibizumab | 254236.995 | 111298.403 | 7.499 | -0.028 | 33901.973 | -3914182.189 |
| 6 | Conbercept | 142938.592 | - | 7.528 | - | 18988.564 | - |
| Ranibizumab | 307112.281 | 164173.690 | 7.499 | -0.028 | 40952.782 | -5773719.246 |

**Table S23.** The one-way sensitivity analysis with different numbers of conbercept injections from the Perspective of the Health Insurance Payer in 2023.

|  | Number of conbercept injections | Strategy | Cost (RMB) | Incremental costs | Effectiveness (QALYs) | Incremental effectiveness | CER | ICER |
| --- | --- | --- | --- | --- | --- | --- | --- | --- |
| AMD | 1 | Conbercept | 100102.816 | - | 7.824 | - | 12793.718 | - |
| Ranibizumab | 156692.258 | 56589.442 | 8.490 | 0.665 | 18457.046 | 85072.487 |
| 3 | Conbercept | 172963.035 | - | 7.824 | - | 22105.675 | - |
| Ranibizumab | 156692.258 | -16270.778 | 8.490 | 0.665 | 18457.046 | -24460.314 |
| 5 | Conbercept | 245823.255 | - | 7.824 | - | 31417.632 | - |
| Ranibizumab | 156692.258 | -89130.997 | 8.490 | 0.665 | 18457.046 | -133993.116 |
| 7 | Conbercept | 318683.474 | - | 7.824 | - | 40729.589 | - |
| Ranibizumab | 156692.258 | -161991.217 | 8.490 | 0.665 | 18457.046 | -243525.917 |
| 9 | Conbercept | 391543.694 | - | 7.824 | - | 50041.546 | - |
| Ranibizumab | 156692.258 | -234851.436 | 8.490 | 0.665 | 18457.046 | -353058.718 |
| BRVO | 1 | Conbercept | 93321.461 | - | 8.346 | - | 11181.752 | - |
| Ranibizumab | 173941.550 | 80620.089 | 8.297 | -0.049 | 20964.554 | -1647463.642 |
| 2 | Conbercept | 130297.216 | - | 8.346 | - | 15612.177 | - |
| Ranibizumab | 173941.550 | 43644.334 | 8.297 | -0.049 | 20964.554 | -891867.702 |
| 3 | Conbercept | 167272.971 | - | 8.346 | - | 20042.602 | - |
| Ranibizumab | 173941.550 | 6668.579 | 8.297 | -0.049 | 20964.554 | -136271.761 |
| 4 | Conbercept | 204248.726 | - | 8.346 | - | 20964.554 | - |
| Ranibizumab | 173941.550 | -30307.176 | 8.297 | -0.049 | 24473.027 | 619324.179 |
| 5 | Conbercept | 241224.481 | - | 8.346 | - | 20964.554 | - |
| Ranibizumab | 173941.550 | -67282.931 | 8.297 | -0.049 | 28903.451 | 1374920.119 |
| CRVO | 1 | Conbercept | 94363.852 | - | 8.156 | - | 11570.248 | - |
| Ranibizumab | 202593.877 | 108230.025 | 8.135 | -0.021 | 24903.993 | -5219226.829 |
| 2.25 | Conbercept | 140583.546 | - | 8.156 | - | 17237.390 | - |
| Ranibizumab | 202593.877 | 62010.331 | 8.135 | -0.021 | 24903.993 | -2990353.043 |
| 3.5 | Conbercept | 186803.239 | - | 8.156 | - | 22904.532 | - |
| Ranibizumab | 202593.877 | 15790.637 | 8.135 | -0.021 | 24903.993 | -761479.257 |
| 4.75 | Conbercept | 233022.933 | - | 8.156 | - | 24903.993 | - |
| Ranibizumab | 202593.877 | -30429.056 | 8.135 | -0.021 | 28571.674 | 1467394.529 |
| 6 | Conbercept | 279242.627 | - | 8.156 | - | 24903.993 | - |
| Ranibizumab | 202593.877 | -76648.750 | 8.135 | -0.021 | 34238.816 | 3696268.315 |
| DME | 1 | Conbercept | 99242.079 | - | 6.973 | - | 14231.804 | - |
| Ranibizumab | 186150.893 | 86908.814 | 6.758 | -0.215 | 27544.902 | -403904.262 |
| 3.75 | Conbercept | 199641.955 | - | 6.973 | - | 28629.642 | - |
| Ranibizumab | 186150.893 | -13491.061 | 6.758 | -0.215 | 27544.902 | 62699.017 |
| 6.5 | Conbercept | 300041.830 | - | 6.973 | - | 43027.481 | - |
| Ranibizumab | 186150.893 | -113890.937 | 6.758 | -0.215 | 27544.902 | 529302.295 |
| 9.25 | Conbercept | 400441.706 | - | 6.973 | - | 57425.319 | - |
| Ranibizumab | 186150.893 | -214290.813 | 6.758 | -0.215 | 27544.902 | 995905.574 |
| 12 | Conbercept | 500841.582 | - | 6.973 | - | 71823.157 | - |
| Ranibizumab | 186150.893 | -314690.689 | 6.758 | -0.215 | 27544.902 | 1462508.852 |
| PM | 1 | Conbercept | 86009.583 | - | 7.528 | - | 11425.875 | - |
| Ranibizumab | 149152.393 | 63142.810 | 7.499 | -0.028 | 19889.160 | -2220628.996 |
| 2.5 | Conbercept | 168897.789 | - | 7.528 | - | 22437.093 | - |
| Ranibizumab | 149152.393 | -19745.396 | 7.499 | -0.028 | 19889.160 | 694413.158 |
| 4 | Conbercept | 251785.994 | - | 7.528 | - | 33448.311 | - |
| Ranibizumab | 149152.393 | -102633.601 | 7.499 | -0.028 | 19889.160 | 3609455.312 |
| 5.5 | Conbercept | 334674.199 | - | 7.528 | - | 44459.529 | - |
| Ranibizumab | 149152.393 | -185521.806 | 7.499 | -0.028 | 19889.160 | 6524497.466 |
| 10 | Conbercept | 417562.405 | - | 7.528 | - | 55470.747 | - |
| Ranibizumab | 149152.393 | -268410.012 | 7.499 | -0.028 | 19889.160 | 9439539.620 |

**Table S24.** The one-way sensitivity analysis with different numbers of ranibizumab injections from the Perspective of the Health Insurance Payer in 2023.

|  | Number of ranibizumab injections | Strategy | Cost (RMB) | Incremental costs | Effectiveness (QALYs) | Incremental effectiveness | CER | ICER |
| --- | --- | --- | --- | --- | --- | --- | --- | --- |
| AMD | 1 | Conbercept | 179520.455 | - | 7.824 | - | 22943.751 | - |
| Ranibizumab | 97139.052 | -82381.403 | 8.490 | 0.665 | 11442.173 | -123846.263 |
| 3 | Conbercept | 179520.455 | - | 7.824 | - | 22943.751 | - |
| Ranibizumab | 181739.510 | 2219.055 | 8.490 | 0.665 | 21407.404 | 3335.968 |
| 5 | Conbercept | 179520.455 | - | 7.824 | - | 22943.751 | - |
| Ranibizumab | 266339.969 | 86819.514 | 8.490 | 0.665 | 31372.635 | 130518.198 |
| 7 | Conbercept | 179520.455 | - | 7.824 | - | 22943.751 | - |
| Ranibizumab | 350940.428 | 171419.972 | 8.490 | 0.665 | 41337.866 | 257700.429 |
| 9 | Conbercept | 179520.455 | - | 7.824 | - | 22943.751 | - |
| Ranibizumab | 435540.886 | 256020.431 | 8.490 | 0.665 | 51303.097 | 384882.659 |
| BRVO | 1 | Conbercept | 155810.487 | - | 8.346 | - | 12093.520 | - |
| Ranibizumab | 100339.151 | -55471.336 | 8.297 | -0.049 | 18669.170 | 1133551.334 |
| 2.75 | Conbercept | 155810.487 | - | 8.346 | - | 18669.170 | - |
| Ranibizumab | 174364.552 | 18554.065 | 8.297 | -0.049 | 21015.537 | -379150.513 |
| 4.5 | Conbercept | 155810.487 | - | 8.346 | - | 18669.170 | - |
| Ranibizumab | 248389.954 | 92579.467 | 8.297 | -0.049 | 29937.555 | -1891852.360 |
| 6.25 | Conbercept | 155810.487 | - | 8.346 | - | 18669.170 | - |
| Ranibizumab | 322415.355 | 166604.868 | 8.297 | -0.049 | 38859.572 | -3404554.208 |
| 8 | Conbercept | 155810.487 | - | 8.346 | - | 18669.170 | - |
| Ranibizumab | 396440.756 | 240630.269 | 8.297 | -0.049 | 47781.590 | -4917256.055 |
| CRVO | 1 | Conbercept | 150936.757 | - | 8.156 | - | 14452.425 | - |
| Ranibizumab | 117570.416 | -33366.341 | 8.135 | -0.021 | 18506.830 | 1609040.595 |
| 2.75 | Conbercept | 150936.757 | - | 8.156 | - | 18506.830 | - |
| Ranibizumab | 191595.817 | 40659.060 | 8.135 | -0.021 | 23552.049 | -1960720.769 |
| 4.5 | Conbercept | 150936.757 | - | 8.156 | - | 18506.830 | - |
| Ranibizumab | 265621.219 | 114684.461 | 8.135 | -0.021 | 32651.672 | -5530482.133 |
| 6.25 | Conbercept | 150936.757 | - | 8.156 | - | 18506.830 | - |
| Ranibizumab | 339646.620 | 188709.863 | 8.135 | -0.021 | 41751.296 | -9100243.497 |
| 8 | Conbercept | 150936.757 | - | 8.156 | - | 18506.830 | - |
| Ranibizumab | 413672.021 | 262735.264 | 8.156 | 0.021 | 50850.920 | -12670004.861 |
| DME | 1 | Conbercept | 171895.080 | - | 6.973 | - | 24650.604 | - |
| Ranibizumab | 103242.444 | -68652.636 | 6.758 | -0.215 | 15276.870 | 319059.609 |
| 3.75 | Conbercept | 171895.080 | - | 6.973 | - | 24650.604 | - |
| Ranibizumab | 219568.074 | 47672.995 | 6.758 | -0.215 | 32489.671 | -221557.799 |
| 6.5 | Conbercept | 171895.080 | - | 6.973 | - | 24650.604 | - |
| Ranibizumab | 335893.705 | 163998.625 | 6.758 | -0.215 | 49702.471 | -762175.207 |
| 9.25 | Conbercept | 171895.080 | - | 6.973 | - | 24650.604 | - |
| Ranibizumab | 452219.335 | 280324.256 | 6.758 | -0.215 | 66915.271 | -1302792.616 |
| 12 | Conbercept | 171895.080 | - | 6.973 | - | 24650.604 | - |
| Ranibizumab | 568544.966 | 396649.886 | 6.758 | -0.215 | 84128.071 | -1843410.024 |
| PM | 1 | Conbercept | 136847.683 | - | 7.528 | - | 18179.422 | - |
| Ranibizumab | 91201.079 | -45646.604 | 7.499 | -0.028 | 12161.474 | 1605316.139 |
| 2.25 | Conbercept | 136847.683 | - | 7.528 | - | 18179.422 | - |
| Ranibizumab | 144076.366 | 7228.683 | 7.499 | -0.028 | 19212.283 | -254220.918 |
| 3.5 | Conbercept | 136847.683 | - | 7.528 | - | 18179.422 | - |
| Ranibizumab | 196951.652 | 60103.970 | 7.499 | -0.028 | 26263.092 | -2113757.975 |
| 4.75 | Conbercept | 136847.683 | - | 7.528 | - | 18179.422 | - |
| Ranibizumab | 249826.939 | 112979.256 | 7.499 | -0.028 | 33313.901 | -3973295.032 |
| 6 | Conbercept | 136847.683 | - | 7.528 | - | 18179.422 | - |
| Ranibizumab | 302702.225 | 165854.543 | 7.499 | -0.028 | 40364.710 | -5832832.088 |

**Table S25.** The one-way sensitivity analysis with different numbers of conbercept injections from the Perspective of the Health Insurance Payer in 2024.

|  | Number of conbercept injections | Strategy | Cost (RMB) | Incremental costs | Effectiveness (QALYs) | Incremental effectiveness | CER | ICER |
| --- | --- | --- | --- | --- | --- | --- | --- | --- |
| AMD | 1 | Conbercept | 75233.176 | - | 7.824 | - | 9615.235 | - |
| Ranibizumab | 156278.309 | 81045.133 | 8.490 | 0.665 | 18408.286 | 121837.410 |
| 3 | Conbercept | 148093.395 | - | 7.824 | - | 18927.192 | - |
| Ranibizumab | 156278.309 | 8184.913 | 8.490 | 0.665 | 18408.286 | 12304.609 |
| 5 | Conbercept | 220953.615 | - | 7.824 | - | 28239.149 | - |
| Ranibizumab | 156278.309 | -64675.306 | 8.490 | 0.665 | 18408.286 | -97228.192 |
| 7 | Conbercept | 293813.834 | - | 7.824 | - | 37551.106 | - |
| Ranibizumab | 156278.309 | -137535.525 | 8.490 | 0.665 | 18408.286 | -206760.994 |
| 9 | Conbercept | 366674.054 | - | 7.824 | - | 46863.063 | - |
| Ranibizumab | 156278.309 | -210395.745 | 8.490 | 0.665 | 18408.286 | -316293.795 |
| BRVO | 1 | Conbercept | 96417.340 | - | 8.346 | - | 11552.699 | - |
| Ranibizumab | 144038.149 | 47620.810 | 8.297 | -0.049 | 17360.404 | -973126.593 |
| 2 | Conbercept | 133393.094 | - | 8.346 | - | 15983.124 | - |
| Ranibizumab | 144038.149 | 10645.055 | 8.297 | -0.049 | 17360.404 | -217530.652 |
| 3 | Conbercept | 170368.849 | - | 8.346 | - | 17360.404 | - |
| Ranibizumab | 144038.149 | -26330.700 | 8.297 | -0.049 | 20413.549 | 538065.288 |
| 4 | Conbercept | 207344.604 | - | 8.346 | - | 17360.404 | - |
| Ranibizumab | 144038.149 | -63306.455 | 8.297 | -0.049 | 24843.974 | 1293661.228 |
| 5 | Conbercept | 244320.359 | - | 8.346 | - | 17360.404 | - |
| Ranibizumab | 144038.149 | -100282.210 | 8.297 | -0.049 | 29274.399 | 2049257.169 |
| CRVO | 1 | Conbercept | 105859.828 | - | 8.156 | - | 12979.806 | - |
| Ranibizumab | 200935.408 | 95075.580 | 8.135 | -0.021 | 24700.124 | -4584873.938 |
| 2.25 | Conbercept | 152079.521 | - | 8.156 | - | 18646.948 | - |
| Ranibizumab | 200935.408 | 48855.887 | 8.135 | -0.021 | 24700.124 | -2356000.152 |
| 3.5 | Conbercept | 198299.215 | - | 8.156 | - | 24314.090 | - |
| Ranibizumab | 200935.408 | 2636.193 | 8.135 | -0.021 | 24700.124 | -127126.366 |
| 4.75 | Conbercept | 244518.908 | - | 8.156 | - | 24700.124 | - |
| Ranibizumab | 200935.408 | -43583.501 | 8.135 | -0.021 | 29981.232 | 2101747.420 |
| 6 | Conbercept | 290738.602 | - | 8.156 | - | 24700.124 | - |
| Ranibizumab | 200935.408 | -89803.194 | 8.135 | -0.021 | 35648.373 | 4330621.206 |
| DME | 1 | Conbercept | 97802.238 | - | 6.973 | - | 14025.324 | - |
| Ranibizumab | 171683.339 | 73881.101 | 6.758 | -0.215 | 25404.126 | -343358.630 |
| 3.75 | Conbercept | 198202.114 | - | 6.973 | - | 28423.162 | - |
| Ranibizumab | 171683.339 | -26518.775 | 6.758 | -0.215 | 25404.126 | 123244.648 |
| 6.5 | Conbercept | 298601.990 | - | 6.973 | - | 42821.000 | - |
| Ranibizumab | 171683.339 | -126918.651 | 6.758 | -0.215 | 25404.126 | 589847.927 |
| 9.25 | Conbercept | 399001.866 | - | 6.973 | - | 57218.839 | - |
| Ranibizumab | 171683.339 | -227318.527 | 6.758 | -0.215 | 25404.126 | 1056451.205 |
| 12 | Conbercept | 499401.741 | - | 6.973 | - | 71616.677 | - |
| Ranibizumab | 171683.339 | -327718.402 | 6.758 | -0.215 | 25404.126 | 1523054.484 |
| PM | 1 | Conbercept | 83155.755 | - | 7.528 | - | 11046.760 | - |
| Ranibizumab | 147207.716 | 64051.961 | 7.499 | -0.028 | 19629.842 | -2252602.360 |
| 2.5 | Conbercept | 166043.960 | - | 7.528 | - | 22057.978 | - |
| Ranibizumab | 147207.716 | -18836.244 | 7.499 | -0.028 | 19629.842 | 662439.794 |
| 4 | Conbercept | 248932.166 | - | 7.528 | - | 33069.196 | - |
| Ranibizumab | 147207.716 | -101724.450 | 7.499 | -0.028 | 19629.842 | 3577481.948 |
| 5.5 | Conbercept | 331820.371 | - | 7.528 | - | 44080.414 | - |
| Ranibizumab | 147207.716 | -184612.655 | 7.499 | -0.028 | 19629.842 | 6492524.102 |
| 10 | Conbercept | 414708.576 | - | 7.528 | - | 55091.632 | - |
| Ranibizumab | 147207.716 | -267500.860 | 7.499 | -0.028 | 19629.842 | 9407566.257 |

**Table S26.** The one-way sensitivity analysis with different numbers of ranibizumab injections from the Perspective of the Health Insurance Payer in 2024.

|  | Number of ranibizumab injections | Strategy | Cost (RMB) | Incremental costs | Effectiveness (QALYs) | Incremental effectiveness | CER | ICER |
| --- | --- | --- | --- | --- | --- | --- | --- | --- |
| AMD | 1 | Conbercept | 120406.512 | - | 7.824 | - | 15388.648 | - |
| Ranibizumab | 92155.391 | -28251.121 | 8.490 | 0.665 | 10855.139 | -42470.698 |
| 3 | Conbercept | 120406.512 | - | 7.824 | - | 15388.648 | - |
| Ranibizumab | 170833.818 | 50427.306 | 8.490 | 0.665 | 20122.804 | 75808.776 |
| 5 | Conbercept | 120406.512 | - | 7.824 | - | 15388.648 | - |
| Ranibizumab | 249512.244 | 129105.732 | 8.490 | 0.665 | 29390.469 | 194088.250 |
| 7 | Conbercept | 120406.512 | - | 7.824 | - | 15388.648 | - |
| Ranibizumab | 328190.671 | 207784.159 | 8.490 | 0.665 | 38658.134 | 312367.725 |
| 9 | Conbercept | 120406.512 | - | 7.824 | - | 15388.648 | - |
| Ranibizumab | 406869.097 | 286462.585 | 8.490 | 0.665 | 47925.798 | 430647.199 |
| BRVO | 1 | Conbercept | 157797.093 | - | 8.346 | - | 11433.635 | - |
| Ranibizumab | 94864.132 | -62932.960 | 8.297 | -0.049 | 18907.205 | 1286028.895 |
| 2.75 | Conbercept | 157797.093 | - | 8.346 | - | 18907.205 | - |
| Ranibizumab | 163707.756 | 5910.663 | 8.297 | -0.049 | 19731.112 | -120783.823 |
| 4.5 | Conbercept | 157797.093 | - | 8.346 | - | 18907.205 | - |
| Ranibizumab | 232551.379 | 74754.286 | 8.297 | -0.049 | 28028.588 | -1527596.540 |
| 6.25 | Conbercept | 157797.093 | - | 8.346 | - | 18907.205 | - |
| Ranibizumab | 301395.002 | 143597.909 | 8.297 | -0.049 | 36326.064 | -2934409.258 |
| 8 | Conbercept | 157797.093 | - | 8.346 | - | 18907.205 | - |
| Ranibizumab | 370238.625 | 212441.533 | 8.297 | -0.049 | 44623.540 | -4341221.976 |
| CRVO | 1 | Conbercept | 179071.822 | - | 8.156 | - | 14593.302 | - |
| Ranibizumab | 118716.452 | -60355.370 | 8.135 | -0.021 | 21956.559 | 2910545.089 |
| 2.75 | Conbercept | 179071.822 | - | 8.156 | - | 21956.559 | - |
| Ranibizumab | 187560.075 | 8488.253 | 8.135 | -0.021 | 23055.952 | -409332.979 |
| 4.5 | Conbercept | 179071.822 | - | 8.156 | - | 21956.559 | - |
| Ranibizumab | 256403.699 | 77331.876 | 8.135 | -0.021 | 31518.602 | -3729211.047 |
| 6.25 | Conbercept | 179071.822 | - | 8.156 | - | 21956.559 | - |
| Ranibizumab | 325247.322 | 146175.500 | 8.135 | -0.021 | 39981.252 | -7049089.116 |
| 8 | Conbercept | 179071.822 | - | 8.156 | - | 21956.559 | - |
| Ranibizumab | 394090.945 | 215019.123 | 8.135 | -0.021 | 48443.903 | -10368967.184 |
| DME | 1 | Conbercept | 174106.144 | - | 6.973 | - | 24967.681 | - |
| Ranibizumab | 96545.442 | -77560.702 | 6.758 | -0.215 | 14285.909 | 360459.389 |
| 3.75 | Conbercept | 174106.144 | - | 6.973 | - | 24967.681 | - |
| Ranibizumab | 204728.278 | 30622.134 | 6.758 | -0.215 | 30293.814 | -142314.800 |
| 6.5 | Conbercept | 174106.144 | - | 6.973 | - | 24967.681 | - |
| Ranibizumab | 312911.115 | 138804.971 | 6.758 | -0.215 | 46301.718 | -645088.990 |
| 9.25 | Conbercept | 174106.144 | - | 6.973 | - | 24967.681 | - |
| Ranibizumab | 421093.951 | 246987.807 | 6.758 | -0.215 | 62309.622 | -1147863.179 |
| 12 | Conbercept | 174106.144 | - | 6.973 | - | 24967.681 | - |
| Ranibizumab | 529276.788 | 355170.644 | 6.758 | -0.215 | 78317.526 | -1650637.369 |
| PM | 1 | Conbercept | 130678.326 | - | 7.528 | - | 17359.859 | - |
| Ranibizumab | 88592.288 | -42086.038 | 7.499 | -0.028 | 11813.597 | 1480096.875 |
| 2.25 | Conbercept | 130678.326 | - | 7.528 | - | 17359.859 | - |
| Ranibizumab | 137766.305 | 7087.979 | 7.499 | -0.028 | 18370.849 | -249272.588 |
| 3.5 | Conbercept | 130678.326 | - | 7.528 | - | 17359.859 | - |
| Ranibizumab | 186940.321 | 56261.996 | 7.499 | -0.028 | 24928.102 | -1978642.051 |
| 4.75 | Conbercept | 130678.326 | - | 7.528 | - | 17359.859 | - |
| Ranibizumab | 236114.338 | 105436.012 | 7.499 | -0.028 | 31485.354 | -3708011.514 |
| 6 | Conbercept | 130678.326 | - | 7.528 | - | 17359.859 | - |
| Ranibizumab | 285288.355 | 154610.029 | 7.499 | -0.028 | 38042.607 | -5437380.977 |
